# Supplementary material for: Identification and Characterization of Perennial Ryegrass (Lolium perenne) Vernalization Genes
Source: Front Plant Sci. 2021 Mar 5;12:640324. doi: 10.3389/fpls.2021.640324 (PMC7973463; doi:10.3389/fpls.2021.640324)
Supplement: Supplementary file 2 [file Data_Sheet_1.XLSX]

## Sheet: Sheet1
Supplementary dataset S1 - Ryegrass genes identified by homology to Brachypodium genes
Brachypodium identifier	protein / gene name	Most likely homolog	LG	Between markers	cM	Gene name	Reference	Recip_blast_hit	Eval	Reciprocal blast match	Notes
Bradi1g10520.1	BdPHYA	maker-scaffold_13514|ref0035067-exonerate_est2genome-gene-0.0	LG4	PHYA	38.516	LpPHYA	Shinozuka et al., 2015	Bradi1g10520.3.p	0	Match
Bradi1g64360.1	BdPHYB	maker-scaffold_4484|ref0039062-exonerate_est2genome-gene-0.0	LG4	PHYB	51.041	LpPHYB	Shinozuka et al., 2015	Bradi1g64360.1.p	0	Match
Bradi1g08400.1	BdPHYC	maker-scaffold_2801|ref0025790-exonerate_est2genome-gene-0.3	LG4	LpPhyC	98.298	LpPHYC	Shinozuka et al., 2015	Bradi1g08400.1.p	0	Match
Bradi3g46590.1	BdCRY1a	maker-scaffold_2214|ref0008010-exonerate_est2genome-gene-0.2	LG6	PTA.56.C1-Ti_Con_102	0-0.211	LpCRY1a	Shinozuka et al., 2015	Bradi3g46590.3.p	0	Match
Bradi5g11990.1	BdCRY1b	maker-scaffold_10404|ref0017286-exonerate_est2genome-gene-0.0	LG2	PTA.236.C1-LpLac11	82.489-82.999	LpCRY1b	Shinozuka et al., 2015	Bradi5g11990.1.p	0	Match
Bradi3g49204.1	BdCRY2	maker-scaffold_4185|ref0010917-exonerate_est2genome-gene-0.1	LG6	CRY2	52.563	LpCRY2	Shinozuka et al., 2015	Bradi3g49204.4.p	0	Match
Bradi1g59010.1		maker-scaffold_1275|ref0038678-exonerate_est2genome-gene-0.0	LG2	r_010d_g04	80.447	Lpck2a-2	Shinozuka et al., 2005	Bradi1g59010.1.p	0	Match
Bradi1g07810.1		maker-scaffold_432|ref0003332-exonerate_est2genome-gene-0.4	No Synteny			Lpck2a-2	Shinozuka et al., 2005	Bradi1g07810.1.p	0	Match
Bradi1g70690.1		maker-scaffold_4141|ref0032482-exonerate_est2genome-gene-0.1	LG4	PTA.2575.C1-PTA.533.C1	59.067-59.476			Bradi1g70690.1.p	0	Match
Bradi1g07750.1		maker-scaffold_12339|ref0012971-exonerate_est2genome-gene-0.0	No Synteny					Bradi1g07750.1.p	0	Match
Bradi1g33610.1	BdZTLa	maker-scaffold_6920|ref0001992-exonerate_est2genome-gene-0.0	LG7	G02_004-PTA.307.C1	63.318-63.77			Bradi1g33610.2.p	0	Match
Bradi3g04040.1	BdZTLb	maker-scaffold_301|ref0020771-exonerate_est2genome-gene-0.4	LG6	PTA.577.C1-PTA.216.C1	40.865-41.824			Bradi3g04040.1.p	0	Match
Bradi4g16630.1	BdFKF1	maker-scaffold_9398|ref0036672-exonerate_est2genome-gene-0.0	No Synteny					Bradi4g16630.1.p	0	Match
Bradi2g14290.1	BdELF3	maker-scaffold_2287|ref0036775-exonerate_est2genome-gene-0.0	LG1	r_006c_h02-PTA.403.C1	93.263-94.104			Bradi2g14290.1.p	0	Match
Bradi4g13230.1		scaffold_13140_between_19566-19754	No Synteny					Bradi4g13227.1	1.1e-43	Match	No annotation on scaffold 13140
Bradi1g60090.1	BdELF4b	maker-scaffold_11043|ref0046165-snap-gene-0.11	No Synteny					Bradi1g60090.1	1.93e-65	Match
Bradi4g29580.1	BdELF4c	scaffold_8511_between_12876-13040	LG5	PTA.1953.C1-PTA.608.C1	29.859-30.941			Bradi4g13227.1	1.35e-25	No Match	No annotation on scaffold 8511
Bradi2g05230.1	BdGI	maker-scaffold_1276|ref0038679-exonerate_est2genome-gene-0.4	LG3	Ti_Con_103-G02_032	29.658-30.37	LpGI	Gagic et al., 2015	Bradi2g05226.1.p	0	Match	rice synteny
Bradi3g42910.1	BdSPY	maker-scaffold_11333|ref0028119-exonerate_est2genome-gene-0.2	LG7	PTA.419.C1-G04_052	38.598-40.51			Bradi3g42910.1.p	0	Match
Bradi2g62070.1	BdLUX	snap_masked-scaffold_5384|ref0005789-processed-gene-0.5	No Synteny					Bradi2g62067.1	8.12e-90	Match
Bradi3g16515.1	BdCCA1	maker-scaffold_4082|ref0025941-exonerate_est2genome-gene-0.0	No Synteny			LpLHY	Shinozuka et al., 2015	Bradi3g16515.1.p	0	Match
Bradi3g60350.1		snap_masked-scaffold_957|ref0012939-processed-gene-0.10	No Synteny					Bradi3g60350.1	4.27e-53	Match
Bradi3g48880.1	BdTOC1	maker-scaffold_6244|ref0025893-exonerate_est2genome-gene-0.2	LG6	PTA.2003.C1	52.109	LpTOC1	Shinozuka et al., 2015	Bradi3g48880.1.p	0	Match
Bradi1g16490.1	BdPRR37	maker-scaffold_13366|ref0021945-exonerate_est2genome-gene-0.0	LG2	PTA.2331.C1-PTA.1053.C1	12.482-12.608	PRR37	Shinozuka et al., 2015	Bradi1g16490.5.p	0	Match
Bradi1g65910.1	BdPRR73	maker-scaffold_5879|ref0040206-exonerate_est2genome-gene-0.2	LG4	ve_004a_f04	51.041			Bradi1g65910.6.p	0	Match
Bradi4g24967.1	BdPRR59	maker-scaffold_4587|ref0024320-exonerate_est2genome-gene-0.3	LG4	PTA.1031.C1	49.368			Bradi4g24967.1.p	0	Match
Bradi4g36077.1	BdPRR95	maker-scaffold_2926|ref0025544-exonerate_est2genome-gene-0.0	LG5	G02_021-RUB	47.8-52.568			Bradi4g36077.3.p	0	Match
Bradi3g57670.1	BdCOP1	maker-scaffold_98|ref0040966-exonerate_est2genome-gene-1.2	LG6	PTA.2105.C1-PTA.386.C1	60.14-60.854			Bradi3g57667.1.p	0	Match	rice synteny
Bradi2g09720.1	BdCDF1a	maker-scaffold_4201|ref0005462-exonerate_est2genome-gene-0.0	LG3	G07_058-PTA.1515.C1	34.82-34.974			Bradi2g09720.1.p	0	Match
Bradi2g10640.1	BdCDF1b	maker-scaffold_214|ref0005187-exonerate_est2genome-gene-0.1	LG3	G06_031-PTA.622.C1	35.5-35.604			Bradi2g10640.1.p	0	Match
Bradi1g17410.1	BdCDF1c	maker-scaffold_1517|ref0023937-exonerate_est2genome-gene-0.3	LG2	PTA.601.C1-PTA.38.C1	42.982-54.475			Bradi1g17410.7.p	0	Match
Bradi1g73710.1	BdCDF1d	maker-scaffold_12108|ref0008083-exonerate_est2genome-gene-0.1	LG4	PTA.161.C2-PTA.847.C1	63.924-64.087			Bradi1g73710.1.p	0	Match
Bradi3g25670.1	BdCDF1e	Not found	No Synteny					#N/A	#N/A	#N/A	Top hit already taken
Bradi2g19930.1		scaffold_4248_between_805-1155	No Synteny					Bradi2g19930.1	2.72e-49	Match	No annotation on Scaffold 4248
Bradi4g27750.1	BdPFT1	maker-scaffold_489|ref0019637-exonerate_est2genome-gene-0.0	No Synteny					Bradi4g27747.2.p	0	Match
Bradi1g43670.1	BdCO1	maker-scaffold_5059|ref0019898-exonerate_est2genome-gene-0.1	LG7	vrn2_3	43.589	LpCO/LpVRN2_3	Andersen et al., 2006	Bradi1g43670.1.p	0	Match
Bradi3g56260.1	BdCO2	maker-scaffold_1084|ref0000358-snap-gene-0.31	LG6	PTA.2125.C1-G04_056	94.018-107.829			Bradi3g56260.1	0	Match
Bradi5g14600.1	BdCO4	maker-scaffold_393|ref0000952-exonerate_est2genome-gene-0.4	No Synteny					Bradi5g14600.1.p	8.05e-146	Match
Bradi3g48447.1	BdCO5	maker-scaffold_24449|ref0048029-exonerate_est2genome-gene-0.0	LG6	PTA.917.C1-rg1_010c_b03	52.05			Bradi3g48447.1.p	9e-84	Match
Bradi1g31280.1	BdCO6	maker-scaffold_1502|ref0005850-exonerate_est2genome-gene-0.1	LG7	PTA.146.C1-LpSSR020	72.946-79.726			Bradi1g31280.1.p	1.63e-134	Match
Bradi3g05800.1	BdCO7	maker-scaffold_10630|ref0040578-exonerate_est2genome-gene-0.0	No Synteny					Bradi3g05800.1.p	1.8e-140	Match
Bradi3g19010.1	BdCO8	scaffold_574_between_107865-108497	No Synteny					Bradi3g19010.1	9.02e-61	Match	No annotation on scaffold_574
Bradi2g48660.1	BdSPA1	maker-scaffold_1379|ref0015994-exonerate_est2genome-gene-0.1	LG3	P7G05-EXP2	46.774-46.988			Bradi2g48657.2.p	0	Match	rice synteny
Bradi2g15900.1	BdSPAa	maker-scaffold_10579|ref0037684-exonerate_est2genome-gene-0.2	LG1	PTA.1007.C1-PTA.1007.C2	61.962-62.999			Bradi2g15900.1.p	0	Match
Bradi1g03880.1	BdAP2-like1	maker-scaffold_1119|ref0034916-exonerate_est2genome-gene-0.0	No Synteny					Bradi1g03880.1.p	0	Match
Bradi1g53650.1	BdAp2-like2	Not found	No Synteny					#N/A	#N/A	#N/A	Top hit already taken
Bradi2g37800.1	BdAP2-like3	maker-scaffold_179|ref0043348-exonerate_est2genome-gene-0.3	LG1	r_013c_h03-PTA.1856.C1	13.404-17.208			Bradi2g37800.9.p	0	Match	rice synteny
Bradi5g24100.1	BdAP2-like4	maker-scaffold_14064|ref0045287-exonerate_est2genome-gene-0.0	No Synteny					Bradi5g24100.1.p	6.34e-180	Match
Bradi1g30340.1		maker-scaffold_10932|ref0042768-exonerate_est2genome-gene-0.0	LG7	PTA.146.C1-LpSSR020	72.946-79.726			Bradi1g30337.1.p	6.5e-96	Match	rice synteny
Bradi2g02720.1	BdABI18	snap_masked-scaffold_188|ref0000325-processed-gene-0.8	No Synteny					Bradi2g02720.1	6.21e-159	Match
Bradi2g02710.1		snap_masked-scaffold_7214|ref0048021-processed-gene-0.5	LG3	0-PTA.714.C1				Bradi2g02710.1	2.04e-126	Match	rice synteny
Bradi2g47220.1	BdABI23	snap_masked-scaffold_2431|ref0006140-processed-gene-0.0	LG3	PTA.927.C1-r_013d_g11	40.864-41.318			Bradi2g47220.1	6.97e-176	Match
Bradi2g17610.1		snap_masked-scaffold_8695|ref0019776-processed-gene-0.6	No Synteny					Bradi2g47220.1	5.13e-157	No_match	Matches 2g47220 (ABI23 above), 17610 is second best 4.51e-136
Bradi1g75000.1	BdELF6	maker-scaffold_13633|ref0043528-exonerate_est2genome-gene-0.0	No Synteny					Bradi1g74997.1.p	4.13e-44	Match
Bradi2g58130.1	BdREF6	maker-scaffold_894|ref0038724-exonerate_est2genome-gene-0.2	LG3	LpRGA4-PTA.1224.C1	53.257-53.905			Bradi2g58130.3.p	0	Match
Bradi3g26910.1	BdID1	maker-scaffold_6847|ref0016329-exonerate_est2genome-gene-0.2	LG1	PTA.824.C1-PTA.1093.C1	30.653-30.871			Bradi3g26910.2.p	0	Match
Bradi2g05900.1	BdIDD2	maker-scaffold_9254|ref0010925-exonerate_est2genome-gene-0.0;maker-scaffold_1604|ref0016425-exonerate_est2genome-gene-0.3	LG3	G05_109-gsa_002a_a07	32.995-33.014			#N/A	#N/A	#N/A	Neither transcript reciprocally matches Bd
Bradi2g60020.1	BdIDD9	maker-scaffold_7280|ref0019345-exonerate_est2genome-gene-0.2	LG3	PTA.1900.C1-PTA.2579.C1	60.493-61.256			Bradi2g60020.1.p	0	Match
Bradi2g07070.1	BdFT2/FTL1	maker-scaffold_13332|ref0029013-exonerate_est2genome-gene-0.0	LG3	PTA.1613.C1-P5G08	31.37-31.405	FT2	Veeckman et al., 2016; Arojju et al., 2016	Bradi2g07070.1.p	1.57e-120	Match	rice synteny
Bradi1g48830.1	BdFT1/FTL2	maker-scaffold_5073|ref0007295-snap-gene-0.11	LG7	LpVRN3	43.677	FT3	Skot et al., 2011; Veeckman et al., 2016	Bradi1g48830.1	2.5e-128	Match
Bradi4g35040.1	BdFTL4	maker-scaffold_2347|ref0000210-exonerate_est2genome-gene-0.4	LG5	G05_092-PTA.1197.C1	43.717-44.893	FT10	Veeckman et al., 2016	Bradi4g35040.3.p	5.01e-77	Match
Bradi5g14010.1	BDFTL5	maker-scaffold_2852|ref0041759-snap-gene-0.18	No Synteny			FT12	Veeckman et al., 2016	Bradi5g14010.1	1.1e-118	Match
Bradi3g48036.1	BdFTL6	maker-scaffold_751|ref0030400-exonerate_est2genome-gene-0.1	LG6	rg1_010c_b03-PTA.2003.C1	52.05-52.109	FT13	Veeckman et al., 2016	Bradi3g48030.1.p	8.45e-75	Match
Bradi4g39730.1	BdFTL7a	snap_masked-scaffold_16549|ref0023552-processed-gene-0.1	LG5	G05_033-PTA.1741.C1	0-3.06	FT14	Veeckman et al., 2016	Bradi4g39730.1.p	8.03e-106	Match
Bradi4g39750.1	BdFTL7b	Not found	No Synteny				Veeckman et al., 2016	#N/A	#N/A	#N/A	Top hit already taken
Bradi4g39760.1	BdFTL7c	maker-scaffold_1244|ref0044124-exonerate_est2genome-gene-0.0	No Synteny			FT17	Veeckman et al., 2016	Bradi4g39760.1.p	2.06e-113	Match
Bradi2g49795.1	BdFTL9	maker-scaffold_5827|ref0034787-exonerate_est2genome-gene-0.3	LG3	PTA.918.C1-G03_089	44.754-46.029	FT8	Veeckman et al., 2016	Bradi2g19670.1.p	6.68e-121	No_match	This is BdFTL10; FTL9 is second best 2.04e-102
Bradi2g19670.1	BdFTL10	Not found*	No Synteny				Veeckman et al., 2016	#N/A	#N/A	#N/A	Likely on LG1 between markers PTA.648.C1 and P5G13.
Bradi1g38150.1	BdFT4/FTL12	maker-scaffold_9269|ref0005840-exonerate_est2genome-gene-0.0	LG7	LpFT	57.38	FT1	Veeckman et al., 2016	Bradi1g38150.1.p	7.61e-119	Match
Bradi3g08890.1	BdFTL13	maker-scaffold_2033|ref0043420-snap-gene-0.18	LG6	PTA.78.C1-PTA.1012.C2	43.296-43.616	FT9	Veeckman et al., 2016	Bradi3g08890.1	2.3e-116	Match	Synteny hit already taken
Bradi2g27860.1	BdMFT1a	maker-scaffold_3301|ref0020207-exonerate_est2genome-gene-0.1	LG7	PTA.1176.C1-rg1_008b_g09	47.33-47.529	FT5	Veeckman et al., 2016	Bradi2g27860.1.p	1.43e-79	Match	rice synteny
Bradi1g42510.1	BdMFT1b	Not found	No Synteny				Veeckman et al., 2016	#N/A	#N/A	#N/A	Top hit already taken
Bradi2g01020.1	BdMFT2	maker-scaffold_25829|ref0017003-snap-gene-0.1	LG3	Ti_Con_103-G02_032	29.658-30.37	FT18	Veeckman et al., 2016	Bradi2g01020.1	1.92e-110	Match
Bradi4g42400.1	BdTFL1	maker-scaffold_16577|ref0028870-snap-gene-0.3	LG5	LpTFL1	27.59	FT7/LpTFL	Veeckman et al., 2016; Jensen et al., 2001	Bradi4g42400.1	7.61e-120	Match
Bradi3g44860.1	BdRCN2	maker-scaffold_2755|ref0033256-exonerate_est2genome-gene-0.0	No Synteny			FT2	Veeckman et al., 2016	Bradi3g44860.1.p	1.72e-113	Match
Bradi5g09270.1	BdRCN4	maker-scaffold_821|ref0016245-exonerate_est2genome-gene-0.0	LG2	PTA.1958.C1-PTA.191.C2	79.894-79.907	FT4	Veeckman et al., 2016	Bradi5g09270.1.p	9.73e-116	Match	rice synteny
Bradi1g21900.1		snap_masked-scaffold_7126|ref0030159-processed-gene-0.2	LG2	PKPA_1-PTA.1958.C1	79.84-79.894			Bradi1g60030.1	4.6e-76	No_match	Best match is 1g60030 (below), 21900 is second best 1.15e-69
Bradi1g60030.1		snap_masked-scaffold_1367|ref0046525-processed-gene-0.4	No Synteny					Bradi1g60030.1	3.05e-85	Match
Bradi3g15670.1		snap_masked-scaffold_6445|ref0046071-processed-gene-0.2	LG7	PTA.936.C2-PTA.198.C2	50.858-51.184			Bradi3g15670.1	2.95e-97	Match
Bradi2g22940.1		maker-scaffold_15784|ref0025125-exonerate_est2genome-gene-0.1	LG1	PTA.978.C1-PTA.493.C1	38.203-38.525			Bradi2g22940.3.p	6.42e-97	Match
Bradi2g15800.1		maker-scaffold_16461|ref0021081-snap-gene-0.6	No Synteny					Bradi2g15800.1	3.22e-60	Match
Bradi2g54200.1		Not found	No Synteny					#N/A	#N/A	#N/A	Top hit already taken
Bradi3g05270.1		maker-scaffold_12061|ref0029071-exonerate_est2genome-gene-0.1	LG6	PTA.577.C1-PTA.216.C1	40.865-41.824			Bradi3g05270.2.p	2.91e-142	Match
Bradi1g32200.1		snap_masked-scaffold_790|ref0008799-processed-gene-0.6	No Synteny					Bradi1g32200.1	4.84e-102	Match
Bradi1g67980.1		maker-scaffold_2197|ref0008307-exonerate_est2genome-gene-0.0	LG4	PTA.1758.C1-PTA.609.C3	53.842-54.331			Bradi1g67980.5.p	3.05e-114	Match	rice synteny
Bradi3g39280.1		snap_masked-scaffold_1415|ref0024100-processed-gene-0.14	LG7	vrn2_2-PTA.505.C1	45.973-46.138			Bradi3g39280.1	2.67e-92	Match	Masked transcript
Bradi4g33290.1		Not found	LG5	PTA.1644.C1-PTA.1237.C2	31.734-32.816			#N/A	#N/A	#N/A	Blast does not match synteny, top hit taken
Bradi5g12510.1		maker-scaffold_15770|ref0017847-exonerate_est2genome-gene-0.0	No Synteny					Bradi3g36480.2.p	1.44e-176	No_match	Matches Bradi3g36480 (below), 12510 is second best 9.67e-162
Bradi4g16640.1		maker-scaffold_1637|ref0011039-exonerate_est2genome-gene-0.0	No Synteny					Bradi4g16640.1.p	2.56e-166	Match
Bradi1g11290.1		maker-scaffold_799|ref0008792-exonerate_est2genome-gene-0.4	LG4	PTA.478.C1	37.943			Bradi1g11290.2.p	1.47e-122	Match
Bradi3g36480.1		Not found	No Synteny					#N/A	#N/A	#N/A	Top hit already taken
Bradi3g46960.1		Not found	No Synteny					#N/A	#N/A	#N/A	Top hit already taken
Bradi3g38640.1		maker-scaffold_11154|ref0034124-exonerate_est2genome-gene-0.0	LG7	vrn2_2-PTA.505.C1	45.973-46.138			Bradi3g38640.1.p	0	Match
Bradi1g77020.1	BdSOC1	maker-scaffold_156|ref0007460-exonerate_est2genome-gene-0.0	LG4	PTA.3084.C1-Ti_Con_108	84.835-97.607			Bradi1g77020.1	3.1e-88	Match	Updated annotation
Bradi3g32090.1	BdSOC1-like	maker-scaffold_10825|ref0033276-exonerate_est2genome-gene-0.0	LG1	PTA.1198.C1-PTA.1436.C1	32.091-32.262			Bradi3g32090.1.p	6.65e-64	Match
Bradi3g00730.1	BdMAD32	maker-scaffold_6002|ref0025562-exonerate_est2genome-gene-0.0	LG6	PTA.56.C1-Ti_Con_102	0-0.211	LpSOC1	Arojju et al., 2016	Bradi3g00737.1.p	1.14e-108	Match
Bradi3g41300.1		maker-scaffold_2419|ref0041984-snap-gene-0.13	No Synteny					Bradi3g41297.1	1.21e-91	Match
Bradi2g59190.1	BdMADS51-like	maker-scaffold_14019|ref0031148-snap-gene-0.7	No Synteny					Bradi2g59120.2	1.33e-76	No_match	Matches 2g59120 (below) still BdMADS51-like, 59190 is second best 1.04e-58
Bradi2g59120.1	BdMADS51-like	snap_masked-scaffold_3738|ref0013345-processed-gene-0.15	No Synteny					Bradi2g59120.2	1.99e-77	Match
Bradi4g30090.1	BdMAD47	Not found	No Synteny					#N/A	#N/A	#N/A	Top hit already taken
Bradi5g14550.1		maker-scaffold_16193|ref0011945-exonerate_est2genome-gene-0.0	LG2	G05_035-PTA.990.C1	79.574			Bradi5g14550.1.p	0	Match
Bradi2g48060.1	BdLFL1	maker-scaffold_5743|ref0006119-exonerate_est2genome-gene-0.0	No Synteny					Bradi2g48057.1.p	2.38e-35	Match
Bradi5g20340.1	BdLFY	scaffold_1714_between_11497-8208	LG2	SSH_SI_Can139-PTA.801.C1	86.746-88.135			Bradi5g20340.1	0	Match	No annotated transcript on scaffold
Bradi1g21980.1		maker-scaffold_3028|ref0043259-snap-gene-0.13	No Synteny					Bradi1g21980.2	3.67e-166	Match	Masked transcript
Bradi1g59250.1	BdFUL2	maker-scaffold_4956|ref0006552-exonerate_est2genome-gene-0.0	No Synteny			LpMADS2	Petersen et al., 2004	Bradi1g59250.1.p	8.6e-139	Match
Bradi1g08340.1	VRN1_FUL1	maker-scaffold_312|ref0002704-exonerate_est2genome-gene-0.1	LG4	vrn1	31.492	LpVRN1	Andersen et al., 2006	Bradi1g08340.1.p	3.18e-43	Match
Bradi4g06870.1		maker-scaffold_5456|ref0004851-exonerate_est2genome-gene-0.1	No Synteny					Bradi4g06867.1.p	2.84e-102	Match
Bradi3g33340.1	BdCO9	maker-scaffold_10876|ref0038749-snap-gene-0.10	No Synteny					Bradi3g33340.1	1.33e-96	Match	No blast hits to syntenic scaffolds
Bradi3g10010.1	BdVRN2	maker-scaffold_1700|ref0031287-exonerate_est2genome-gene-0.0	No Synteny					Bradi3g10010.1.p	1.48e-31	Match
Bradi2g21820.1	BdFDL2	maker-scaffold_8636|ref0033684-exonerate_est2genome-gene-0.0	LG1	PTA.767.C1-PTA.1007.C1	57.504-61.962			Bradi2g21820.1.p	1.78e-156	Match
Bradi2g53060.1	BdbZIP41	maker-scaffold_423|ref0033813-exonerate_est2genome-gene-0.0	LG3	PTA.1162.C1-PTA.1484.C1	50.309-50.48			Bradi2g53060.6.p	0	Match
Bradi1g63840.1	BdbZIP20	maker-scaffold_440|ref0044604-exonerate_est2genome-gene-0.0	No Synteny					Bradi1g63840.1	1.03e-32	Match
Bradi4g43850.1	BdFDL36	maker-scaffold_12990|ref0036404-exonerate_est2genome-gene-0.0	LG5	PTA.1709.C1-G01_095	25.426-25.782			Bradi4g43850.3.p	2.01e-177	Match
Bradi2g24120.1		maker-scaffold_7965|ref0007974-exonerate_est2genome-gene-0.1	No Synteny					Bradi2g24120.3.p	1.89e-80	Match
Bradi2g56080.1		maker-scaffold_4901|ref0021606-exonerate_est2genome-gene-0.0	LG3	PTA.1162.C1-PTA.1484.C1	50.309-50.48			Bradi2g56096.3.p	1.04e-80	Match	rice synteny
Bradi2g55550.1	BdbZIP42	maker-scaffold_3460|ref0022619-exonerate_est2genome-gene-0.4	No Synteny					Bradi2g55550.1.p	8.98e-69	Match
Bradi4g32090.1	BdbZIP71	maker-scaffold_3347|ref0045262-exonerate_est2genome-gene-0.1	LG5	PTA.1644.C1-PTA.1237.C2	31.734-32.816			Bradi4g32090.1.p	2.25e-174	Match
Bradi3g38200.1	BdbZIP56	Not found	No Synteny					#N/A	#N/A	#N/A	Top hit already taken
Bradi1g46060.1	BdbZIP16	maker-scaffold_11848|ref0010003-exonerate_est2genome-gene-0.0	No Synteny					Bradi1g46060.2.p	3.56e-160	Match
Bradi3g57960.1	BdbZIP62	maker-scaffold_14262|ref0006657-exonerate_est2genome-gene-0.0	No Synteny					Bradi3g57960.6.p	7.58e-139	Match
Bradi3g00300.1	BdbZIP45	maker-scaffold_19233|ref0021310-exonerate_est2genome-gene-0.0	No Synteny					Bradi3g00300.1.p	1.15e-46	Match
Bradi4g36587.1	BdDFL1	Not found	No Synteny					#N/A	#N/A	#N/A	Top hit already taken
Bradi3g60870.1	BdbZIP63	maker-scaffold_2219|ref0008013-exonerate_est2genome-gene-0.0	LG6	PTA.2659.C1-PTA.2129.C1	57.253-58.232			Bradi3g60870.1.p	3.5e-31	Match	Annotation needed correction
Bradi1g29920.1	BdbZIP8	maker-scaffold_5161|ref0039043-exonerate_est2genome-gene-0.0	LG7	PTA.265.C1-RPG	106.227-110.004			Bradi1g29920.1.p	5.51e-78	Match
Bradi5g21700.1	BdMAD55	maker-scaffold_172|ref0043343-exonerate_est2genome-gene-1.2	LG2	PTA.449.C1-PTA.1036.C1	90.206-90.667			Bradi5g21700.2.p	1.87e-151	Match
Bradi1g45810.1	BdVRT2	maker-scaffold_4448|ref0017406-exonerate_est2genome-gene-0.0	LG7	ve_001a_a11-PTA.2059.C1	44.783-45.378	LpMADS16	Ergon et al. 2013	Bradi1g45812.1.p	6.5e-130	Match	rice synteny
Bradi1g72150.1	BdMAD18	maker-scaffold_78|ref0006767-snap-gene-1.30	No Synteny					Bradi1g72150.5	1.43e-150	Match
Bradi3g58220.1	BdMAD44	maker-scaffold_17914|ref0043065-exonerate_est2genome-gene-0.0	LG6	PTA.2129.C1-PTA.859.C1	58.232-58.374	LpMADS10	Petersen et al., 2006	Bradi3g58220.2.p	7.33e-127	Match
Bradi1g01520.1	BdFRI	maker-scaffold_1544|ref0030922-exonerate_est2genome-gene-0.5	No Synteny					Bradi1g01520.2.p	8.29e-38	Match
Bradi1g15320.1		maker-scaffold_1064|ref0014577-exonerate_est2genome-gene-0.5	No Synteny					Bradi1g15317.1.p	3.51e-142	Match
Bradi1g15310.1		Not found	No Synteny					#N/A	#N/A	#N/A	Best protein already represented
Bradi4g38000.1	BdSUF4	maker-scaffold_13041|ref0047118-exonerate_est2genome-gene-0.2	LG5	PTA.1250.C1-G07_065	74.298-74.543			Bradi4g38000.1.p	0	Match
Bradi4g08730.1	BdFCA	maker-scaffold_12071|ref0011173-exonerate_est2genome-gene-0.0	No Synteny					Bradi4g08727.4.p	0	Match
Bradi2g60820.1	BdFY	maker-scaffold_8995|ref0019393-exonerate_est2genome-gene-0.0	No Synteny					Bradi2g60817.1.p	0	Match
Bradi5g18210.1	BdFLD	maker-scaffold_12064|ref0029074-exonerate_est2genome-gene-0.1	LG2	PTA.2404.C1-PTA.817.C1	85.3-85.656			Bradi5g18210.1.p	0	Match
Bradi4g35250.1	BdFPA	maker-scaffold_6622|ref0027132-exonerate_est2genome-gene-0.0	LG5	G05_092-PTA.1197.C1	43.717-44.893			Bradi4g35250.22.p	0	Match	rice synteny
Bradi2g47940.1	BdFVE	maker-scaffold_341|ref0045819-exonerate_est2genome-gene-0.3	No Synteny					Bradi2g47940.1.p	0	Match
Bradi2g59940.1	BdLD	maker-scaffold_5227|ref0045645-exonerate_est2genome-gene-0.1	No Synteny					Bradi2g59937.1.p	0	Match
Bradi4g02690.1	BdFLKa	maker-scaffold_774|ref0042888-exonerate_est2genome-gene-0.0	LG5	G05_071-PTA.1480.C1	17.5-18.836			Bradi4g02690.1.p	7.31e-177	Match
Bradi1g14320.1	BdFLKb	maker-scaffold_7065|ref0030538-exonerate_est2genome-gene-0.1	LG4	G02_018-G02_029	45.395-45.977			Bradi1g14320.1.p	0	Match
Bradi3g24710.1	BdLHP1	maker-scaffold_2824|ref0016896-exonerate_est2genome-gene-0.1	No Synteny					Bradi3g24710.2.p	8.98e-60	Match
Bradi3g12900.1		maker-scaffold_5713|ref0000647-exonerate_est2genome-gene-0.1	No Synteny					Bradi3g12902.1.p	0	Match
Bradi3g33600.1	BdPEP	maker-scaffold_12617|ref0042172-exonerate_est2genome-gene-0.1	LG1	r_008a_f02-G02_017	33.003-33.307			Bradi3g33600.3.p	0	Match
Bradi1g48340.1	BdCLF	maker-scaffold_6459|ref0015540-exonerate_est2genome-gene-0.0	No Synteny					Bradi1g48340.2.p	0	Match
Bradi3g14520.1	BdFIE1	maker-scaffold_4385|ref0037320-exonerate_est2genome-gene-0.2	No Synteny					Bradi3g14520.1.p	0	Match
Bradi1g13930.1	BdMSI1	maker-scaffold_6614|ref0009121-exonerate_est2genome-gene-0.1	LG4	G05_056-G02_018	45.109-45.395			Bradi1g13930.1.p	0	Match
Bradi1g64460.1	BdSWN	maker-scaffold_14117|ref0033419-exonerate_est2genome-gene-0.1	LG4	PHYB-ve_004a_f04	51.041			Bradi1g64460.5.p	0	Match
Bradi4g05950.1	BdVIL5	maker-scaffold_12626|ref0047658-exonerate_est2genome-gene-0.1	LG5	G06_096-LpLac62	21.778-22.368			Bradi4g05950.1.p	0	Match
Bradi2g36240.1		maker-scaffold_3350|ref0014712-snap-gene-0.26	No Synteny					Bradi2g36237.1	0	Match
Bradi3g17950.1	BdVIL4	maker-scaffold_5307|ref0047900-exonerate_est2genome-gene-0.1	LG7	gsa_008c_h12-PTA.1252.C1	52.703-53.388			Bradi3g17950.4.p	0	Match
Bradi1g33450.1	BdVIL1	maker-scaffold_6167|ref0023087-exonerate_est2genome-gene-0.6	LG7	G02_004-PTA.307.C1	63.318-63.77			Bradi1g33450.2.p	0	Match
Bradi3g04140.1	BdVIL3	maker-scaffold_8882|ref0022306-exonerate_est2genome-gene-0.0	LG6	PTA.577.C1-PTA.216.C1	40.865-41.824			Bradi3g04140.5.p	0	Match
Bradi3g03110.1		maker-scaffold_12290|ref0048236-exonerate_est2genome-gene-0.0	LG5	PTA.2918.C1-PTA.1462.C1	26.868-26.898			Bradi3g03106.3.p	0	Match	rice synteny
Bradi3g03040.1	BdPAF	maker-scaffold_7627|ref0000601-exonerate_est2genome-gene-0.0	LG6	G01_048-PTA.2831.C1	44.538-44.76			Bradi3g03040.1.p	0	Match
Bradi1g57640.1	BdPIE1	maker-scaffold_4461|ref0004924-exonerate_est2genome-gene-0.2	No Synteny					Bradi1g57635.1.p	0	Match
Bradi3g45730.1		maker-scaffold_12764|ref0015886-exonerate_est2genome-gene-0.0	No Synteny					Bradi3g45727.7.p	0	Match
Bradi2g10130.1	BdARP6	maker-scaffold_6487|ref0019290-exonerate_est2genome-gene-0.0	No Synteny					Bradi2g10130.6.p	0	Match
Bradi2g10130.1	BdARP6	maker-scaffold_2071|ref0020178-exonerate_est2genome-gene-0.1	No Synteny					Bradi2g10130.6.p	3.1e-157	Match	Top hit already taken
