# Supplementary material for: Identification and Characterization of Perennial Ryegrass (Lolium perenne) Vernalization Genes
Source: Front Plant Sci. 2021 Mar 5;12:640324. doi: 10.3389/fpls.2021.640324 (PMC7973463; doi:10.3389/fpls.2021.640324)
Supplement: Supplementary file 3 [file Data_Sheet_2.XLSX]

## Sheet: Sheet1
Supplementary dataset S2 - Unannotated protein sequences identified by homology to Brachypodium
>scaffold_13140 between 19566-19754
MEGDSFSGMGNGGGAGAGGHHQQVVDGKLIQTFHKSFVQVQSILDQNRMLISEINQNHESRAPDSLTRNVGLIRELNNNIRRVVGLYADLSASFAHRGGMDGGSSEGDSSGTLRSPDAAARAAAGQKRVRPG
>maker-scaffold_11043|ref0046165-snap-gene-0.11
MEGDTMSGFGGAPATNGVDTKVLHAFQSSFVQVQGLLDQNRVLINEINQNHESKVPGDLSRNVGLIRELNNNIRRVVDLYANLSSLFAASSGGGGGRAMSEGGSVGTVRQAGHKRIRSGMD
>scaffold_8511 between 12876-13040
MENGSSNGGEVNGKAVQALQRSFGEVQGILEHNRMLIQEIGQNHESRDAGGLSRNVALIRELNSNIARVVGLYSDLSTSFSGSLLAKGPDDAAAAANKRPRPTQ
>snap_masked-scaffold_5384|ref0005789-processed-gene-0.5
MGSEAGGYDFDFLGGGGGDEYEGRVAEWEAGLPGCDELTPLSQPLVPPGLAAAFRIPPEPGRTLLDVHRASSATVSRLRSSPGSGSSPSSGPNAHATGGGGSFPSFSSKGDGNSAESAGEKTAAKRARLVWTPQLHKRFVDVVAHLGIKHAVPKSIMQLMNVDGLSRENVASHLQKYRLYVTRMQGSASSDRPSPSDDHIFASTPVPREPVPAAPMPPAVYHHPAPMTMGGITGGGHSGYYQHQQHAVYNGYGGGGGHSYPHYHHGDR
>snap_masked-scaffold_957|ref0012939-processed-gene-0.10
MTTRPGDGGGDADKQMVPVATTANANGNGTTALAVRKAPSKDRHSKVDGRGRRIRMPIICAARVFQLTRELGHKSDGQTIEWLLRQAEPSIVAATGSGTVPASFSTSSPSSSSSNAHALHHHHHHHHQMLPHAHAAPFIPGKRARGADDDEQVNVASMGPTPGFWAALPARDLGQLWSFAPQQELMVSGEASAARVGNYLPIPMAQANLNLLASFSGGPAGAATPGRVQAEEETTAH
>scaffold_4248 between 805-1155
MVSHVEMGGAAGIKLFGKVITRQPATRAGTDIGAPSKTSQQAPPPMSSSGRGSVEQLEEAARARAAAAEARLPCPRCRSEDTKFCYFNNYNVNQPRHFCRACHRYWTAGGAIRNVPVGSGRRKNRPVLHGTSTMVMSGDHRLAGTESPGLALGFPPEHPGWFHAAPSPAYTGHGEMEQYLWLVHQCQPQRPG
>maker-scaffold_1084|ref0000358-snap-gene-0.31
MLMNCDFNCDLFEQEAKRRSYPWARPCDGCHAAPSAVYCHADAAYLCASCDTQVHSANRLASSHERVXVCVSCESAAAVLECHADSAALCTTCDAQVHSANPIAQRHQRVPVLPLPALAIPAASVFAEAEAATTVYGDKEEGEEVDSWLLLERDSDDNNCTNNIDQYFNLFGYDMYYDKFSCNPGPGEEYRLQEQDVQNMYRENEVCEFAVPSQVVIASEQPESSYGMIGAEQDASMTAGTSTYTASISNGIPFSSMEVGIIPDNTRPDVSNTNIQRTSEAMELAGHSLQMPVHFSSMDRDARVLRYKEKKQARTFQKTIRYATRKAYAEARPRIKGRFAKRSDIEHELDQMLTIPALPDSGHATVLWF
>scaffold_574 between 107865-108497
MGSEGSSTSPNGSGAAACAVCGGMAAVYCPADSAALCASCDAAIHAANPLASRHERVPLASAMVATSGVYDLFAADDEGVSSWPGQGLGQGSPNSSSSSFSNCSGAETNLFHLLSDVDLMATGAAGGSLSDGMPIHGAAAPLWLQPGIAVDASTWSSPLESAVVAAAAAAADRRERVRRYREKRKNRKFQKTIRYASRKAYAEARPRIKGRFVKRAAGSDDDSTSAAAEGAKFWLSFSDDSVVFDAASYGVVPSF
>snap_masked-scaffold_188|ref0000325-processed-gene-0.8
MGVEILSCTAEHSSQYSSGASTATTESGATRPPTVLSLPVAVTDEAVTSRPASAQSSSSSRFKGVVPQPNGRWGAQIYERHARVWLGTFPDEDTAARAYDVAALRYRGREAATNYPCAAEAAELAFLAAHSKAEIVDMLRKHTYADELRQGLRRGRGMGARAQPTPAWAREPLFEKAVTPSDVGKLNRLVVPKQHAEKHFPLKRSPETTTTTTGKGVLLNFEDGEGKVWRFRYSYWNSSQSYVLTKGWSRFVREKGLGAGDAIVFSCSAYGPEKQFFIDCKKTTPMASRTASPSVSPPLAGTAKVEQVRVVRLFGVDIAGAKRGRAAEQGPQELFKRQCMEHGQRSPALGALVL
>snap_masked-scaffold_7214|ref0048021-processed-gene-0.5
MASGKATNPKMDMAAMDDNDDMDVEYSSPESGAEDAVEPSSWAPAPVPPRATGTSRFKGVVPQPNGRWGAQIYEKHSRVWLGTFPDEDAASRAYDVAALRFRGRDAVTNHQRPPAPEEAAGSSSTSELDPELAFLNDHSKAEIVDMLRKHTYADELRQGLRRGNGGRAQPTPAWAREHLFEKAVTPSDVGKLNRLVVPKQQAERHLPQTVTGGGSDKGVLLNFEDGEGKVWRFRYSYWNSSQSYVLTKGWSRFVREKGLGAGDTVVFSCSTYGPEKQFFIDYKKTTTADAAIAGNENETGHVAVKLFGVDIAGKGAEGSSGG
>snap_masked-scaffold_2431|ref0006140-processed-gene-0.0
MDSSSCVADDATTSSGGAAASCTDKLKALAAAAAEAAGPLERMGSGASAVLDASEPGTEADSGGARVTVTAGGKLPSSRYKGVVPQPNGRWGAQIYERHQRVWLGTFAGEGDAARAYDVAAQRFRGRDAVTNFRPLAEADPDASHQLRFLASRSKAEVVDMLRKHTYFDELAQSRRVATTATVPAPDGGRPSSPRLPSAAAASAAREHLFDKTVTPSDVGKLNRLVIPKQHAEKHFPLQPPAAGAEGKGLLLNFEDAGGGKVWRFRYSYWNSSQSYVLTKGWSRFVKEKGLNAGDVVGFYRSDGSGEGCSKLFIDCKLRTTTTSTTASFTTAAADQPAPAATKAVRLFGVDLLAAPAAPDQGCKRSRDLVKPPPEAAFKKQCLKLALA
>snap_masked-scaffold_8695|ref0019776-processed-gene-0.6
MDSTSCLVDDASSGASTGKKASPAALKPLQRVGSGASAVMDAAEPGTEADSGGAGRGGRLPSSKYKGVVPQPNGRWGAQIYERHQRVWLGTFTGEAEAARAYDAAAQRFRGRDAVTNFRPLVESDPDDSAELRFLAARSKAEVVDMLRKHTYPEELAQNKRAFAAASPSPPPHQNPATTSSSVVARDHLFDKTVTPSDVGKLNRLVIPKQHAEKHFPLQLPAGAAVSGECKGVLLNFEDGTGKVWRFRYSYWNSSQSYVLTKGWSRFVKEKGLHAGDAVGFYRSAAPGNNDQLFIDCKLRLKTTTATTTFINAQAPVRTVRLFGVDLLTTAVPRPAAPEQDVYDMANMSKRSRDAGTVGAVWKKRCIDFALT
>snap_masked-scaffold_7126|ref0030159-processed-gene-0.2
MPDSDNDSGGPSNADFSSPKEQDRFLPIANVSRIMKKALPANAKISKDAKETVQECVSEFISFITGEASDKCQREKRKTINGDDLLWAMTTLGFEDYMEPLKLYLHKFRELEGEKAVGVGVGAAPSSGGPGSQSQQRESTTPRGNGEPGGGYGGMYGGAGGGGMFMMMGQPMYGASPPASGYQHPSHHHQMMTGGQGGYGYGDGGAGGGTSSSSGFGRQDRT
>snap_masked-scaffold_1367|ref0046525-processed-gene-0.4
MPDSDNDSGGPTGGELSSPREQDRFLPIANVSRIMKKALPANAKISKDAKETVQECVSEFISFITGEASDKCQREKRKTINGDDLLWAMTTLGFEDYVEPLKHYLHKFREIEGERAAASTGGGSTSSTPQLAELPRNNNAGGYVGYGGASPGTGPGSGMMMMMGQPMYGSPPPAQQQQQQHQQQQQQQHHMAMGGRGGFGHHGGSGGAGSHGNQ
>snap_masked-scaffold_6445|ref0046071-processed-gene-0.2
MKNRKSYGQQQQSHLLSPVGSPPSDNESGLAATPGGGGGDSPSKEQDRFLPIANVSRIMKRSLPANAKISKEAKETVQECVSEFISFVTGEASDKCQREKRKTINGDDLLWAMTTLGFEAYVAPLKAYLNRYREVEGEKAAVVGGTGLHHGDEDAHSSLSAAAMHGSGDRGGASGVGQDCDVGLMMGVNVGFSAGTGTTFYAAAHERRAYGGGEGAFGGDQEANGAGGERGFAGHLHGVQW
>maker-scaffold_16461|ref0021081-snap-gene-0.6
MSESVDTPESGGGAKEQERFLPIANIGRIMRRGVPENGKIAKDAKESIQECVSEFISFITSDDKCMKEKRKTINGDDLIWSMGTLGFEDYVEPLKLYLKLYREVIPLPSSMLCS
>snap_masked-scaffold_790|ref0008799-processed-gene-0.6
MEQQPQPAMGDVAGGSQVYPASAYAPTSTVAPGVTPAGSQPTPLPANPAQLSAQNQLLYEQSQQYQQQLQQEHQRQLQQFWAERLSEIEQTTDFKNHALPLARIKKIMKADEDVRMISAEAPMIFAKACEMFILELTLRSWMHTEENKRRTLQKNDISAAITRTDIYDFLVDIIPRDEMKEEGVGVRAGQPAPVDTSQYYYAQQAQQQMPGAEMVYCGQQGQPTTYLYQEPQEQQRGPPSEQQSFNESG
>snap_masked-scaffold_1415|ref0024100-processed-gene-0.14
MEPKSTTPPPPVPVLGAPVGYPPPGVYPGAGRAPATRTRRRSTRLPPPPPAVSAASQQAAAQQQMQQLQAFWAEQYREIEATTDFKNHNLPLARIKKIMKADEDVRMIAAEAPVVFARACEMFILELTHRGWAHAEENKRRTLQKSDIAAAIARTEVFDFLVDIVPRDEAKDAEAAVAAGMQHPAAGMPTADGMGYYYVPQQ
>maker-scaffold_2419|ref0041984-snap-gene-0.13
MEEEEETGRMRVQQHVTAAEGGGKKAKRKRGKVELRRIEDRTSRQVRFSKRRSGLFKKAFELSVLCDVEVALVVFSPAGRLYEFVSSNTSVEEIFGRCRGLSNTAIDLNIDPRDSGVDYNMKLDLNKQSVPDAVSELNHFAEWSLELDVNEMSMPELRKFEEIVTDTLAVIKSKLMTKMAEFTQTERNPRKTGKNNLGSQSENE
>maker-scaffold_14019|ref0031148-snap-gene-0.7
MARRGRVELRRIEDRTSRQVRFSKRRAGLFKKAFELALLCDAEVALLVFSPAGKLYEYASTSIEGTYDRYQKFAESGTSLDQGDANISNDEDPSNIQSRLRKIAAWSLDNNANDSDADSLANLEKLLKDALKITESKKASAKQENGGSTSGENSNGPRGHEE
>snap_masked-scaffold_3738|ref0013345-processed-gene-0.15
MARRGRVELRRIEDRTSRQVRFSKRRSGLFKKAFELSLLCDAEVALLVFSPAGKLYEYSSSSIEDTYDRYQQFSGAGRNLNEGDAGSNNNEDPSSIQSRLRDIFSWSIQNNADESDANKLEKLEKLLTAALRNTKSKKMLAKQSSGASSSSQNSKRPSGLDEGRA
>scaffold_1714 between 11497-8208
MDPHDAFLAAHPFRWDLGPPAPAAVPPPPPLPMPQTPVLPPPNSPRELEDLVAGYGVRGSTVARISELGFTASTLLVMTDRELDDMTAALAGLFRWDLLIGERFGLRAALRAERGRLMALHGGRHHGHQSGSTIDGASQEVLSNERDGAASGEDDAGRMMLSGKKLKNGSVARKAKKARRKKVDGLRLDHMQEDEREDGGGRSESTESSAGGGGGVGGERQREHPFVVTEPGEVARAKKNGLDYLFHLYEQCRLFLLQVQSMAKLHGHKSPTKVTNQVFRYASKVGASYINKPKMRHYVHCYALHCLDQEASDALRRAYKARGENVGAWRQACYAPLVDIAAGHGFDVDAVFAAHPRLAIWYVPTRLRQLCHQARSAHDAAAANANGAMPPPPPMF
>maker-scaffold_3028|ref0043259-snap-gene-0.13
MGRGPVQLRRIENKINRQVTFSKRRSGLLKKAHEISVLCDAEVALIVFSTKGKLYEYSSQDSNMDVILERYQRYSFEERAIVDQTIGGQANWGDEFGSLKIKLDALQKSQRQLLGEQLDPLTTKELQQLEQQLDSSLKHIRSRKNQLLFESISELQKKEKSLKDQNGVLQKHLVETEKEKNNVLSNIHHREQPNGAANIHRREQLNETTHIHNQEQLNGATTSSPSPTPVAVLDSVATLNIGYFDFHCHLNLEKQQERSQNLSRPQHKQTAASYHHGCSAPSVTDDEMKGSDGALCDSTGRRSRRLTVHHGS
>maker-scaffold_10876|ref0038749-snap-gene-0.10
MSAASGAACRVCGGGVEDCSCLLQRGRGAGGLRCGVADLNRGFPSGLFIQAAEEPAVIDVANGGGAAAVGLQEFQFFGQDDQESVAWLFNDHSPVGGEDRLQHRPAVTEHQHRRQVFESFAEYQPGHGLTFDVPVTLPLSRGVDVAAGLGLGGGIPATSGATIMPFCGRETLTFTDASASSIDPNDDAAAGLANGGSYPAGPSGVMGADVLAPTEQREAKLMRYKEKRKKRRYEKQIRYASRKAYAEMRPRVKGRFAKVPDGGDGETTPPQQQPAAAYEPGRLDLGWFRS
>maker-scaffold_78|ref0006767-snap-gene-1.30
MAGKRERISIRKIENLAARQVTFSKRRRGLFKKAEELSILCDAEVGLAVFSATGKLFNFASSSMNQIIDRYNSHSKTLQRSDEPSQLDLREDGNCTELREELAEASLWLRQMRGEELQSLNVQQLQALEKSLESGLGSVLKTKSKKIMDEISELERKAMQLIEENSRLKEQLQASKMEMQVAADSPVVYEEGQSSESVTNTSYPRPPLDTEDSSDTSLRLGLPLFNS
>maker-scaffold_3350|ref0014712-snap-gene-0.26
MSKSTPVKASKNVELKKQSAAVLLIANGHGSKKEAVNGEDTGHDVKCTSTWICRNLACKAVITSEDSFCKRCSCCICHQFDDNKDPSLWLVCASENDDKQCCGSSCHIECAFRHKRVGCFDIGKIIHLDGNYSCASCGKVSGILSYWRRQLVVAKEARRVDILCHRIYVSYRLLKGTSCHKELHDIIENAKAKLECEVGPLDGMSAKMARGIVSRLSGGSDILKLCSLAIQRADEWLSSPDLHLRDSLPAACRFRFEDIASSSLVIILKETKVASSDTIKGYKLWHWKSREQPNMDEPVILSKDQRKILVYNLATCTEYSFRVISFTDDGILGHSEAKCYTGSNELLTNRATQNAMAICLQKQRRDGNQASKSSGFRIRDVGRILRRAWAEEGYFEDVY…
>maker-scaffold_9269|ref0005840-exonerate_est2genome-gene-0.0-mRNA-1
MSNDSLTRAHIVGDVLDPFASSVPLTVMYDGRPVFNGMEFRSPAVTLKPRVEIGGDDFRVSYTLVMIDPDAPNPSNPTLREYLHWMVTDVPASTDDSFGREIVPYESPSPTMGIHRIVLVLYQQLGRGTVFAPQVRQNFNSRSFARRFNLRKPVAAMYFNCQRPTGTGGRRFT
>maker-scaffold_13332|ref0029013-exonerate_est2genome-gene-0.0-mRNA-1
MVGIQRADPLVVGRVIGDVVDPFVRRVPLRVGYASRDVANGCELRPSAIADQPRVEVGGPDMRTFYTLVMVDPDAPSPSDPSLREYLHWLVTDIPATTGVSFGTEVVCYESPRPVLGIHRLVFLLFQQLGRQTVYAPGWRQNFSTRDFAELYNLGSPVAVVYFNCQRESGTGGRRM
>maker-scaffold_5073|ref0007295-snap-gene-0.11-mRNA-1
MAGRDRDPLVVGRVVGDVLDPFIRTTNLRVTFGNRAVSNGCELKPSMVTHQPRVEVGGNEMRTFYTLVMVDPDAPSPSDPNLREYLHWLVTDIPGTTGASFGQEVMCYESPRPNMGIHRFVLVLFQQLGRQTVYAPGWRQNFNTRDFAELYNLGPPVAAVYFNCQREAGSGGRRMYN
>maker-scaffold_2755|ref0033256-exonerate_est2genome-gene-0.0-mRNA-1
MSRALEPLVVGKVIGEVLDSFNPTVKMTATYSSNKQVFNGHEFFPSAIAAKPRVEVQGGDLRSFFTLVMTDPDVPGPSDPYLREHLHWIVTDIPGTTDASFGKEVVHYESPKPNIGIHRFILVLFQQTHRGSVKNTPSSRDRFRTREFAKDNELGLPVAAVYFNAQRETAARRR
>maker-scaffold_3301|ref0020207-exonerate_est2genome-gene-0.1-mRNA-1
MAAHVDPLVVGRVIGDVVDMFVPTMPLSVRFGTKDLTNGCEIKPSLAAAAPMVQIAGRLGDLFTLVMTDPDAPSPSEPTMKEWLHWLVVNIPGGSDPSQGQEVVPYMAPQPPLGIHRYVLVLYQQKARVAAPAQGPGPDAEMRARFSTRAFAGRHDLGLPVAAMYFNAQREPASRRRR
>maker-scaffold_821|ref0016245-exonerate_est2genome-gene-0.0-mRNA-1
MARVVEPLIVGKVIGEVIDNFTPTEKMTVTYSSNKQVFNGHEFFPSAVVSKPRIEVQGGDMRSFFTLVMTDPDVPGPSDPYLREHLHWIVNNIPGTTDASFGKEVVSYESPKPNIGIHRFTFVLFKQKQRQTMSPPSSRDYFNTRRFAAANDLGLPVAAVYFNAQRETAARRR
>maker-scaffold_16577|ref0028870-snap-gene-0.3
MSRSVEPLIVGRVIGEVIDPFNPCVKMVATYNSNKLVFNGHELYPSAVVSKPRVEVQGGDLRSLFTLVMTDPDVPGPSDPYLREHLHWIVSNIPGTTDASFGGEVMSYESPKPNIGIHRFIFVLFKQKRRQTVSVPSFRDHFNTRQFAVDNDLGLPVAAVYFNCQRETAARRR
>maker-scaffold_5827|ref0034787-exonerate_est2genome-gene-0.3-mRNA-1
MSAAEPLVVAHVIQDVLDPFTSTVPLRIAYNNRLVLAGAELRPSAVVSKPRVDIGGNDMRVLYTLILVDPDAPSPSHPSLREYLHWMVADIPGTTGVNFGQELVVYERPEPRSGIHRMVFVLLQQLGRGTVFAPDMRQNFSCRNFARQYHLNIVAASYFNCQREGGSGGRRFRPGSSEGE
>maker-scaffold_2033|ref0043420-snap-gene-0.18
MSNDSLVTGRVIGEVLDPFRTTVDMTVLYDGRPIINGMEFRSQAVSGRPTVEIGGDDTSATYTLVMVDPDAPNPSNPTLREYLHWMVTDIPASTDDTYGREVVCYESPAPATGIHRMVLVLFRQLGRGTVFPPSMRHNFNTRSFARCYNLGAPVAAKYFNFQRQAGSGGRKFTGPYTSRRQ
>maker-scaffold_2347|ref0000210-exonerate_est2genome-gene-0.4
MSRGRDPLALSQVIGDVLDPFVKSAAMRINYGEKEITNGTGLRASSVLNAPQVEIEGRDRTKLYTLVMVDPDAPSPSKPEYREYLHWLVTDIPEATDARFGNEIVPYEAPRPPAGIHRLVFVLFKQEARQTVYAPGWRPNFNIRDFSAFYNLGPPVAALFFNCQKESGVGGRR
>maker-scaffold_1783|ref0029509-snap-gene-0.24
MSRDPLVVGHIVGDIVDPFMTTASLRIFFNNKEMTNGSELKPSQVFKVPRVYIGGRDMRNLYTLVMVDPDAPSPSNPTERENLHWLVTDIPETTDASFGNEIVPYESPRPTAGIHRFVFILFRQSIRQATYAPGWRANFCTRDFAAIYNLGPPVAGMYFNCQRENGCGGRRYIR
>maker-scaffold_2852|ref0041759-snap-gene-0.18-mRNA-1
MSEALAIGHVVGDILDPFVKAASLKVIYNSKVLTNGSELKPSQVANEPRIEIAGRDMRNLYTLVMVDPDSPSPSNPTKREYLHWLVTDIPESTNASYGNEVVSYESPKPTAGIHRFAFVLFRQSVQQTIYAPGWRQNFNTRDFSALYSLGPPVAAVFFNCQRENGCGGRRYIR
>maker-scaffold_751|ref0030400-snap-gene-0.22-mRNA-1
MSRDPLVVGNVVGDILDPFIKSASLKILYNNRELTNGSDLKPSQVASEPRVEIAGRDMRNLYTLVMVDPDSPSPSNPTKREYLHWLVTDIPESTDASFGNEIVSYESPKPTAGIHRFAFVIFRQSVRQTIYAPGWRPNFNSRDFSALYSLGPPVAAVFFNCQRETGCGGRRYIR
>snap_masked-scaffold_16549|ref0023552-processed-gene-0.1-mRNA-1
MSRDPLIVGGIVGTVVDYFDASARLRVLYSNREITNGSELRPSQVANQPTVHITGLPGSHYTLVMIDPDAPTPSNPSQREYLHWLVTDIPEGRDVRHGTEVVAYERPQPTAGIHRIAFVVFRQAVRQAISAPGWRSNFITRDLDECYSLGGPVAAVYFICQREGTCGGRRYR
>maker-scaffold_172|ref0043343-snap-gene-0.17-mRNA-1
MSRDPLIVGGIVGDIVDYFDASARLRVLYSNREITNGSELRPSQVANQPTVQITGRPGSLYTLVMVDPDVPTPSDPSQREYLHWLVTDIPEGRDVSRGTEVVAYERPQPTAGIHRVAFVAFRQSVQQAIYAPGWRSNFITRDLAECYNLGVPVAAAYFYCQREGTCGGRRYR
>maker-scaffold_1244|ref0044124-snap-gene-0.24-mRNA-1
MQRDPLIVGSIVGDIVDYFDASARLRVLYHNREITIGSELRPSHVANQPTVQITGLSGSLYTLVMVDPDAPSPSDPSEREYLHWMVTDIPERGDVNRGNEVVSYESPRPAAGIHRFAFVVFRQIVQQTIYAPGWRANFNTRDFAAFYNLNAPVVAAYFNCQREGSCGGRRYR
>maker-scaffold_1244|ref0044124-exonerate_est2genome-gene-0.0-mRNA-1
MQRDPLIVGNIVGDIVDYFDASARLRVLYGNREITVGSELRPSHVANQPTVQITGLSRSFYTLVMVDPDAPSPSDPSEREYVHWLVTDIPEGGDVSRGTEVVAYESPRPTAGIHRFVFVVFRQTVQQIIYAPGWRANFNTRDFAAFYSLGAPAAAAYINCQREGSCGGRRYR
>maker-scaffold_25829|ref0017003-snap-gene-0.1-mRNA-1
MSRFVDPLVVGRVIGEVVDLFVPSVAMAVSYGAKDVSNGCHVKPSIAADQPLVRISGRRNDLYTLLMTDPDAPSPSDPTMREYLHWIVMNIPGGTDATKGDVVMPYLGPQPPVGIHRYVLVLFQQKSRIVDGYAAPPADRPYFNTRAFAFNHELGLPVAVVYFNSQREPSGNRRRR
>maker-scaffold_156|ref0007460-exonerate_est2genome-gene-0.0
MVRGKTQMKRIENATSRQVTFSKRRGGLLKKAFELSVLCDAEVALILFSPRGRLYEFASASMQRTIERYKTSTKDNIRSQTVQQDIEKIKADAEGLSKKLEALDAYKRCRKLLGCNLEECAIEELQSLEVKIEKSLVSIRARKARLFEEQLAKLKQKEVTLRKENEDLQGQRKNEEQLAAAAAAAPVAVAAAEQSHPQPEQEKDEMEVETELFIGLPGRGRS
>maker-scaffold_1700|ref0031287-exonerate_est2genome-gene-0.0 (VRN2b)
MSCGVCGGVANCLHHHIIDHAPMFPVLRHEPPLLEYQFFGNGQGHSVGTWLPPPADHHNVQNTRPPSTFHGLQYPPHGHQAAAGLITFQVDAGSRHMPPATPPIAMPLCGSTRTNTAGSEVIMAIDGDMMMVAAHHPTVHERRAKVMRYREKRKRRRYEKQIRYESRKAYAQLRPRVKGRFAKVHEEATVPLSPPPSTYDPSKLDLGWFHP
>maker-scaffold_2219|ref0008013-exonerate_est2genome-gene-0.0
MSEEAGSPQLSLSGFSSLFSISSATHPPPAAHPHHLDLPCLSLSIGTAAGAGDDQAVSSSGGDDQETTASVRMMKNRESALRSRARKRAYVQELEKEVRRLVDDNLKLKRQCKQLKAEMAALVQQQPTHR
