# Supplementary material for: Identification and Characterization of Perennial Ryegrass (Lolium perenne) Vernalization Genes
Source: Front Plant Sci. 2021 Mar 5;12:640324. doi: 10.3389/fpls.2021.640324 (PMC7973463; doi:10.3389/fpls.2021.640324)
Supplement: Supplementary file 4 [file Data_Sheet_3.XLSX]

## Sheet: Sheet1
Supplementary Dataset S3 - RNAseq expression of flowering time genes. Data is shown as reads per million mapped reads (RPM).
Brachypodium identifier	protein / gene name	Most likely homolog	Veyo_0h_vern	Veyo_2d_vern	Veyo_4w_vern	Veyo_9w_vern	Veyo_7d_LD	Veyo_pattern	Falster_0h_vern	Falster_2d_vern	Falster_4w_vern	Falster_9w_vern	Falster_7d_LD	Falster_pattern	Veyo_merist_9w_vern	Veyo_merist_1d_LD	Veyo_merist_7d_LD	Veyo_merist_pattern	Falster_merist_9w_vern	Falster_merist_1d_LD	Falster_merist_7d_LD	Falster_merist_pattern
Bradi1g10520.1	BdPHYA	maker-scaffold_13514|ref0035067-exonerate_est2genome-gene-0.0	3.2986	4.31443	4.98113	4.14478	4.28824		15.4849	177.022	336.743	242.294	12.0916		57.6886	47.4187	64.8618		183.445	113.821	39.5958
Bradi1g64360.1	BdPHYB	maker-scaffold_4484|ref0039062-exonerate_est2genome-gene-0.0	67.4877	126.478	152.642	175.89	153.9		102.467	63.9028	187.782	177.595	94.6601		90.9825	82.3152	94.1698		61.7423	65.6463	64.1074
Bradi1g08400.1	BdPHYC	maker-scaffold_2801|ref0025790-exonerate_est2genome-gene-0.3	102.078	79.551	92.0243	100.876	117.371		139.848	129.29	196.968	159.879	106.838		138.963	122.276	152.305		133.11	107.096	123.292
Bradi3g46590.1	BdCRY1a	maker-scaffold_2214|ref0008010-exonerate_est2genome-gene-0.2	136.937	166.253	109.247	141.623	188.683		167.189	169.366	182.496	129.918	143.458		83.8258	66.7545	79.1955		54.1136	51.3181	80.0295
Bradi5g11990.1	BdCRY1b	maker-scaffold_10404|ref0017286-exonerate_est2genome-gene-0.0	174.113	235.284	186.666	202.102	183.124		222.595	233.659	204.594	207.122	186.729		64.7208	47.787	56.8542		58.1062	60.456	56.8796
Bradi3g49204.1	BdCRY2	maker-scaffold_4185|ref0010917-exonerate_est2genome-gene-0.1	31.9162	65.2483	31.8286	30.0643	46.0589		46.9386	63.356	83.0159	52.9746	29.7972		80.652	51.47	59.6569		103.308	70.6172	61.1744
Bradi1g59010.1		maker-scaffold_1275|ref0038678-exonerate_est2genome-gene-0.0	122.494	150.296	142.258	143.608	125.391		211.345	211.082	223.398	216.935	142.767		162.238	134.798	193.304		181.591	158.998	178.076
Bradi1g07810.1		maker-scaffold_432|ref0003332-exonerate_est2genome-gene-0.4	48.9442	66.9623	53.3572	58.3772	62.0207		63.9962	78.902	82.236	66.5222	51.4757		68.0813	69.7009	72.4691		49.5507	56.0698	56.6701
Bradi1g70690.1		maker-scaffold_4141|ref0032482-exonerate_est2genome-gene-0.1	25.6756	12.8251	26.172	25.686	41.2942		40.4059	22.0301	27.5564	33.6085	51.6485		15.2467	20.4407	17.1363		18.3231	21.7846	18.1219
Bradi1g07750.1		maker-scaffold_12339|ref0012971-exonerate_est2genome-gene-0.0	17.2954	14.4799	16.9696	16.8126	14.9294		24.0742	22.1863	23.397	18.0635	14.1645		26.3239	21.9139	20.1792		22.7434	18.8605	23.6737
Bradi1g33610.1	BdZTLa	maker-scaffold_6920|ref0001992-exonerate_est2genome-gene-0.0	83.7132	89.3028	88.4784	90.4263	65.5942		98.7163	101.323	122.357	96.9174	59.8535		36.4677	33.055	37.3956		32.0119	25.8784	30.9015
Bradi3g04040.1	BdZTLb	maker-scaffold_301|ref0020771-exonerate_est2genome-gene-0.4	96.0161	107.27	106.714	111.967	68.8501		122.307	115.619	126.43	120.105	73.5861		49.5363	29.6482	30.8294		37.4304	24.4163	27.8637
Bradi4g16630.1	BdFKF1	maker-scaffold_9398|ref0036672-exonerate_est2genome-gene-0.0	2.85285	26.8322	49.2203	58.6107	52.0942		4.96001	34.5294	56.4127	50.2824	26.6016		29.8711	11.7856	20.2593		12.5481	12.5737	7.54205
Bradi2g14290.1	BdELF3	maker-scaffold_2287|ref0036775-exonerate_est2genome-gene-0.0	61.0688	57.2696	51.7531	62.3468	66.7854		61.3347	63.2778	69.9309	55.4062	52.1667		26.7595	25.0444	35.7941		26.736	23.9046	27.3399
Bradi4g13230.1		scaffold_13140_between_19566-19754	2.67454	1.41844	2.36393	2.39346	1.90589		2.41952	1.95302	2.77297	2.25793	1.3819		1.99141	1.93358	2.00191		0.926848	1.53516	1.88551
Bradi1g60090.1	BdELF4b	maker-scaffold_11043|ref0046165-snap-gene-0.11	11.3222	21.1584	16.2942	17.6299	15.1677		18.1464	18.5927	18.7176	12.766	14.5963		11.2017	9.11544	9.28885		10.9796	9.79577	10.4751
Bradi4g29580.1	BdELF4c	scaffold_8511_between_12876-13040	0.534909	0.295509	0.337704	0.350263	0.794119		0.725855	0.624966	0.95321	0.781592	0.863687		0.871241	1.01283	0.640611		0.35648	0.80413	0.314252
Bradi2g05230.1	BdGI	maker-scaffold_1276|ref0038679-exonerate_est2genome-gene-0.4	14.3534	46.454	410.141	513.427	243.953		35.8088	88.6671	641.25	777.771	178.783		306.366	159.75	207.157		485.24	230.127	187.085
Bradi3g42910.1	BdSPY	maker-scaffold_11333|ref0028119-exonerate_est2genome-gene-0.2	9.71751	12.8251	12.5795	9.28197	8.89413		17.0576	9.60886	13.7782	11.4634	7.42771		17.3626	17.7705	18.4976		15.6851	14.4743	14.1413
Bradi2g62070.1	BdLUX	snap_masked-scaffold_5384|ref0005789-processed-gene-0.5	0.0891515	2.30497	5.23441	13.5435	6.6706		0.120976	2.03114	5.89257	4.95008	1.46827		3.5472	4.60376	3.20305		1.14074	0.80413	0.209501
Bradi3g16515.1	BdCCA1	maker-scaffold_4082|ref0025941-exonerate_est2genome-gene-0.0	3534.5	1179.97	851.014	527.496	190.35		4816.17	1788.11	1031.11	903.521	471.314		231.937	14.8241	73.2698		299.372	52.5609	206.254
Bradi3g60350.1		snap_masked-scaffold_957|ref0012939-processed-gene-0.10	1.78303	1.30024	3.46146	1.98482	1.35		3.87123	1.01557	2.77297	2.95268	3.45475		3.29827	6.99771	7.52717		5.63238	10.0882	7.6468
Bradi3g48880.1	BdTOC1	maker-scaffold_6244|ref0025893-exonerate_est2genome-gene-0.2	18.0978	80.9103	104.688	135.785	100.535		26.8566	97.651	137.349	153.453	27.2061		78.225	48.5236	63.5806		82.9172	34.4314	19.7979
Bradi1g16490.1	BdPRR37	maker-scaffold_13366|ref0021945-exonerate_est2genome-gene-0.0	23.6251	2.18677	34.5302	48.6866	60.8295		8.22635	5.54658	22.0105	19.7135	42.7525		15.1845	12.4301	24.5034		8.55552	6.79855	12.6748
Bradi1g65910.1	BdPRR73	maker-scaffold_5879|ref0040206-exonerate_est2genome-gene-0.2	201.572	231.62	210.474	245.243	302.718		222.595	218.27	228.597	182.545	280.957		142.759	97.5076	168.401		103.878	82.3137	122.873
Bradi4g24967.1	BdPRR59	maker-scaffold_4587|ref0024320-exonerate_est2genome-gene-0.3	21.4855	117.317	146.057	201.46	208.536		47.9064	135.461	234.056	238.82	88.0097		118.613	59.7568	112.267		85.6978	43.3499	60.8602
Bradi4g36077.1	BdPRR95	maker-scaffold_2926|ref0025544-exonerate_est2genome-gene-0.0	189.358	232.034	672.368	487.333	142.465		116.5	367.48	942.985	745.552	100.274		232.559	28.5433	93.9295		100.028	32.019	41.3765
Bradi3g57670.1	BdCOP1	maker-scaffold_98|ref0040966-exonerate_est2genome-gene-1.2	166.624	104.374	98.103	102.277	69.9619		116.016	137.571	80.5896	104.299	107.184		39.8282	31.9501	36.2746		31.3702	27.6328	35.1962
Bradi2g09720.1	BdCDF1a	maker-scaffold_4201|ref0005462-exonerate_est2genome-gene-0.0	35.6606	58.7471	22.6262	13.8938	11.8324		80.5699	49.7629	41.1613	16.4134	8.37776		4.48067	2.2098	6.0858		3.5648	2.85101	2.93302
Bradi2g10640.1	BdCDF1b	maker-scaffold_214|ref0005187-exonerate_est2genome-gene-0.1	1.24812	0.650119	1.35082	0.467018	0.794119		0.241952	0.703087	0.606588	0.955279	0.172737		6.59654	6.72149	10.5701		4.63424	5.48271	4.50428
Bradi1g17410.1	BdCDF1c	maker-scaffold_1517|ref0023937-exonerate_est2genome-gene-0.3	96.5511	45.2719	34.1081	22.8839	15.3265		134.888	63.2778	59.6189	32.1321	34.4611		16.8025	8.93129	15.0543		14.5444	7.74889	15.0841
Bradi1g73710.1	BdCDF1d	maker-scaffold_12108|ref0008083-exonerate_est2genome-gene-0.1	113.133	129.669	98.7784	100	84.6531		261.913	149.601	91.1615	75.8144	132.403		21.1587	5.70866	13.0524		10.6231	8.26061	9.32281
Bradi2g19930.1		scaffold_4248_between_805-1155	0	0	0.084426	0	0.158824		0	0.0781208	0	0.0868436	0.0863687		0.248926	0.644526	0.560534		0.213888	0.292411	0.523754
Bradi4g27750.1	BdPFT1	maker-scaffold_489|ref0019637-exonerate_est2genome-gene-0.0	81.3062	93.3808	88.8161	96.3224	94.4208		118.072	88.589	123.571	97.0043	65.2084		113.137	88.0239	119.634		100.171	88.1619	93.6471
Bradi1g43670.1	BdCO1	maker-scaffold_5059|ref0019898-exonerate_est2genome-gene-0.1	0.891515	8.09694	3.54589	7.64741	6.27354		0.604879	4.21852	1.29983	0.868436	4.92302		2.11587	1.38113	1.04099		1.14074	0.657925	0.942756
Bradi3g56260.1	BdCO2	maker-scaffold_1084|ref0000358-snap-gene-0.31	8.73685	8.68796	8.4426	11.7922	11.753		5.20196	1.32805	4.07281	5.21061	5.35486		1.61802	1.56528	1.28122		3.77869	4.16686	2.61877
Bradi5g14600.1	BdCO4	maker-scaffold_393|ref0000952-exonerate_est2genome-gene-0.4	221.72	208.629	210.558	231.057	215.842		266.389	250.69	212.393	169.519	254.269		34.1651	14.0875	18.5777		16.9684	16.375	22.8357
Bradi3g48447.1	BdCO5	maker-scaffold_24449|ref0048029-exonerate_est2genome-gene-0.0	7.75618	2.54138	4.559	1.69294	5.40001		5.20196	3.67168	4.33277	2.08425	6.30491		11.3261	18.415	20.3394		18.0379	20.6881	20.3216
Bradi1g31280.1	BdCO6	maker-scaffold_1502|ref0005850-exonerate_est2genome-gene-0.1	77.6509	82.0332	97.0899	89.7841	38.5148		125.573	80.3082	82.756	51.4982	72.4633		7.71671	1.19698	2.00191		3.06573	2.19308	4.50428
Bradi3g05800.1	BdCO7	maker-scaffold_10630|ref0040578-exonerate_est2genome-gene-0.0	93.8765	39.8346	100.636	89.4922	39.6265		125.331	44.9195	124.177	84.1514	65.4675		14.4999	9.39167	8.24786		7.77126	6.50614	4.71378
Bradi3g19010.1	BdCO8	scaffold_574_between_107865-108497	9.0043	3.84161	10.3	6.83013	2.85883		7.13757	6.48403	10.572	8.1633	5.5276		12.7575	5.15621	2.80267		33.723	14.3281	7.75155
Bradi2g48660.1	BdSPA1	maker-scaffold_1379|ref0015994-exonerate_est2genome-gene-0.1	382.995	219.859	201.525	158.027	62.5766		298.931	233.269	166.205	172.819	120.83		35.9076	22.1901	18.4976		141.736	68.1318	130.1
Bradi2g15900.1	BdSPAa	maker-scaffold_10579|ref0037684-exonerate_est2genome-gene-0.2	150.844	90.4257	76.7432	64.2733	56.2236		131.017	107.025	84.2291	82.0672	74.5362		48.0427	32.9629	45.4033		43.2054	36.1859	41.7955
Bradi1g03880.1	BdAP2-like1	maker-scaffold_1119|ref0034916-exonerate_est2genome-gene-0.0	13.0161	5.31916	11.3975	8.93171	4.44707		6.16977	6.87463	7.10575	8.94489	8.5505		15.869	13.1667	18.0973		14.6157	13.4509	16.0269
Bradi2g37800.1	BdAP2-like3	maker-scaffold_179|ref0043348-exonerate_est2genome-gene-0.3	87.101	112.057	44.8302	80.6189	112.844		136.461	272.642	115.078	112.897	248.483		41.6329	28.3592	32.4309		39.0702	67.8393	64.9454
Bradi5g24100.1	BdAP2-like4	maker-scaffold_14064|ref0045287-exonerate_est2genome-gene-0.0	10.1633	12.4114	34.8679	45.2423	22.2353		12.3395	22.4988	46.6206	46.4613	14.769		36.281	24.7682	22.7417		22.886	15.9364	20.1121
Bradi1g30340.1		maker-scaffold_10932|ref0042768-exonerate_est2genome-gene-0.0	0.802363	0.472814	0.42213	0.525395	1.50883		0.362927	0.312483	0.346622	0.607905	1.29553		10.766	11.6935	8.56817		3.4935	2.5586	3.98053
Bradi2g02720.1	BdABI18	snap_masked-scaffold_188|ref0000325-processed-gene-0.8	2.13964	5.61467	1.60409	1.98482	0.873531		1.08878	1.40617	2.07973	0.521061	0.0863687		2.86265	1.8415	2.00191		1.7111	1.97377	2.09501
Bradi2g02710.1		snap_masked-scaffold_7214|ref0048021-processed-gene-0.5	0	0.531916	0.168852	0	0		0	0	0	0	0.0863687		0.0622315	0.368301	0.320305		0.213888	0.0731027	0.104751
Bradi2g47220.1	BdABI23	snap_masked-scaffold_2431|ref0006140-processed-gene-0.0	2.05048	8.62886	8.02047	11.3836	9.13237		1.33073	7.73396	7.36571	9.03173	8.20503		5.66307	3.68301	4.64443		7.62867	6.14063	11.1036
Bradi2g17610.1		snap_masked-scaffold_8695|ref0019776-processed-gene-0.6	20.1482	30.9102	14.4368	24.46	26.9206		21.4127	18.9052	13.6049	7.46855	16.0646		13.6287	6.62941	10.0095		13.9027	10.5268	17.3886
Bradi1g75000.1	BdELF6	maker-scaffold_13633|ref0043528-exonerate_est2genome-gene-0.0	21.8421	29.3736	20.3467	25.8027	23.1883		26.0098	25.5455	30.1561	27.3557	15.2873		42.1307	39.1319	47.4052		35.5767	31.9459	36.8722
Bradi2g58130.1	BdREF6	maker-scaffold_894|ref0038724-exonerate_est2genome-gene-0.2	0	0	0.084426	0	0.238236		0.120976	0.312483	0.173311	0.434218	0.604581		0.311158	0.18415	0.320305		1.49722	0.731027	1.46651
Bradi3g26910.1	BdID1	maker-scaffold_6847|ref0016329-exonerate_est2genome-gene-0.2	1.42642	1.47754	0.759834	1.2843	0.794119		1.57269	0.93745	1.21318	1.04212	2.59106		2.05364	1.93358	3.12298		1.35462	2.41239	2.19976
Bradi2g05900.1	BdIDD2	maker-scaffold_9254|ref0010925-exonerate_est2genome-gene-0.0;maker-scaffold_1604|ref0016425-exonerate_est2genome-gene-0.3	0	0	0	0	0		0	0	0	0	0		0	0	0		0	0	0
Bradi2g60020.1	BdIDD9	maker-scaffold_7280|ref0019345-exonerate_est2genome-gene-0.2	0.356606	0.531916	0.928686	0.817281	0.476471		0.483903	0.156242	0.173311	0.347374	0.345475		0.684547	1.1049	0.800763		2.35277	1.68136	1.78076
Bradi2g07070.1	BdFT2/FTL1	maker-scaffold_13332|ref0029013-exonerate_est2genome-gene-0.0	7.84533	10.1064	12.7483	9.92412	11.2765		1.93561	2.42174	6.58581	7.29486	1.20916		6.65877	1.65735	3.68351		2.21017	0.950336	0.838006
Bradi1g48830.1	BdFT1/FTL2	maker-scaffold_5073|ref0007295-snap-gene-0.11	0.0891515	0.413712	0.253278	0.116754	16.5177		0.120976	0.234362	0.0866555	0.260531	0.518212		0.0622315	0	0.560534		0	0	0
Bradi4g35040.1	BdFTL4	maker-scaffold_2347|ref0000210-exonerate_est2genome-gene-0.4	1.06982	0.177305	0.42213	0.525395	0.873531		0.604879	0.859329	0.779899	2.95268	1.12279		2.30257	1.93358	2.00191		0.570368	1.16964	1.46651
Bradi5g14010.1	BDFTL5	maker-scaffold_2852|ref0041759-snap-gene-0.18	0.891515	0.531916	0.928686	0.934035	1.27059		1.33073	1.09369	1.47314	2.34478	1.12279		1.30686	2.5781	1.84176		2.21017	2.04688	1.57126
Bradi3g48036.1	BdFTL6	maker-scaffold_751|ref0030400-exonerate_est2genome-gene-0.1	0.0891515	0	0	0.175132	0		0.120976	0.0781208	0.0866555	0.0868436	0		0.124463	0	0.0800763		0.071296	0	0.104751
Bradi4g39730.1	BdFTL7a	snap_masked-scaffold_16549|ref0023552-processed-gene-0.1	0.267454	0.236407	0	0.0583772	0.0794119		0	0	0	0	0		0	0	0		0	0	0
Bradi4g39760.1	BdFTL7c	maker-scaffold_1244|ref0044124-exonerate_est2genome-gene-0.0	0.534909	0.531916	0	0	0		0.120976	0.0781208	0	0	0.172737		0	0	0		0.142592	0	0
Bradi2g49795.1	BdFTL9	maker-scaffold_5827|ref0034787-exonerate_est2genome-gene-0.3	1.42642	13.7707	10.7221	13.6603	1.90589		9.43611	13.8274	61.3521	29.1794	7.08223		0.622315	0.0920752	0		0.926848	0.438616	0.838006
Bradi1g38150.1	BdFT4/FTL12	maker-scaffold_9269|ref0005840-exonerate_est2genome-gene-0.0	2.85285	9.04257	4.98113	2.5686	14.6912		9.19416	12.4212	0.866555	0.781592	5.7867		0	0	0		0.142592	0.292411	0.104751
Bradi3g08890.1	BdFTL13	maker-scaffold_2033|ref0043420-snap-gene-0.18	0	0	0	0	0		0	0	0	0.0868436	0		0.0622315	0	0		0	0	0
Bradi2g27860.1	BdMFT1a	maker-scaffold_3301|ref0020207-exonerate_est2genome-gene-0.1	0.0891515	0.118204	0	0.0583772	0.238236		0	0	0.0866555	0	0		0	0	0.240229		0	0.0731027	0
Bradi2g01020.1	BdMFT2	maker-scaffold_25829|ref0017003-snap-gene-0.1	0	0	0	0	0		0	0	0.0866555	0	0		0	0.0920752	0		0	0	0
Bradi4g42400.1	BdTFL1	maker-scaffold_16577|ref0028870-snap-gene-0.3	6.77551	7.21041	11.0598	9.51548	9.37061		5.92781	2.2655	3.81284	7.12117	2.7638		9.52142	12.246	14.9743		7.55737	8.1144	7.75155
Bradi3g44860.1	BdRCN2	maker-scaffold_2755|ref0033256-exonerate_est2genome-gene-0.0	0	0	0	0	0		0	0	0	0.0868436	0		4.04505	0.644526	5.92565		5.13331	1.46205	0.628504
Bradi5g09270.1	BdRCN4	maker-scaffold_821|ref0016245-exonerate_est2genome-gene-0.0	0	0	0.084426	0.0583772	0		0	0	0.0866555	0.173687	0		1.1824	1.74943	4.32412		0.926848	0.657925	0.209501
Bradi1g21900.1		snap_masked-scaffold_7126|ref0030159-processed-gene-0.2	0.980666	1.30024	1.60409	4.02803	3.9706		0.604879	2.89047	3.20625	1.65003	3.0229		1.86695	0.920752	1.04099		0.998144	0.80413	0.523754
Bradi1g60030.1		snap_masked-scaffold_1367|ref0046525-processed-gene-0.4	46.9828	11.9386	26.8475	19.1477	12.5471		14.759	9.7651	12.1318	16.5871	18.5693		3.60943	4.97206	4.00382		3.13702	1.97377	1.15226
Bradi3g15670.1		snap_masked-scaffold_6445|ref0046071-processed-gene-0.2	2.13964	4.13712	2.2795	4.37829	5.87648		2.17756	6.09342	0.866555	1.9974	13.5599		2.73819	1.1049	2.40229		1.56851	1.46205	1.88551
Bradi2g22940.1		maker-scaffold_15784|ref0025125-exonerate_est2genome-gene-0.1	11.3222	11.4657	11.5664	12.4343	12.0706		9.31514	6.71839	15.5113	12.6792	8.89598		31.1158	43.9199	43.8818		19.6777	30.63	33.1012
Bradi2g15800.1		maker-scaffold_16461|ref0021081-snap-gene-0.6	4.54673	6.8558	8.7803	9.39873	3.3353		6.77464	5.07785	9.18548	10.3344	3.45475		22.2166	12.9826	16.3356		16.8971	14.4012	12.1511
Bradi3g05270.1		maker-scaffold_12061|ref0029071-exonerate_est2genome-gene-0.1	9.53921	17.4941	10.4688	14.0689	14.6118		15.9688	15.9366	13.085	11.637	11.4007		14.3132	16.4815	18.3375		13.4749	14.0357	16.1316
Bradi1g32200.1		snap_masked-scaffold_790|ref0008799-processed-gene-0.6	0	0	0.168852	0.116754	0.317648		0	0	0	0.0868436	0		0.124463	0.0920752	0.320305		0.142592	0.292411	0.209501
Bradi1g67980.1		maker-scaffold_2197|ref0008307-exonerate_est2genome-gene-0.0	102.524	66.9032	155.344	216.287	301.13		67.1416	66.8714	129.55	137.821	288.126		9.45919	4.23546	7.04672		2.70925	3.21652	5.13278
Bradi3g39280.1		snap_masked-scaffold_1415|ref0024100-processed-gene-0.14	3.65521	5.91018	7.68276	10.6246	7.46472		6.65367	12.9681	17.4177	16.3266	12.0916		17.1137	20.9011	18.2574		17.9666	17.3253	16.8649
Bradi5g12510.1		maker-scaffold_15770|ref0017847-exonerate_est2genome-gene-0.0	6.41891	2.60048	5.48769	4.26153	1.82647		6.41172	6.64027	3.63953	7.20802	23.4059		124.152	316.646	242.551		95.4653	191.822	169.801
Bradi4g16640.1		maker-scaffold_1637|ref0011039-exonerate_est2genome-gene-0.0	63.0301	75.0592	88.2251	94.5127	93.7061		80.207	89.6046	100	89.7094	98.2012		146.929	161.868	155.989		157.921	157.098	157.336
Bradi1g11290.1		maker-scaffold_799|ref0008792-exonerate_est2genome-gene-0.4	87.9925	202.364	151.798	151.489	168.671		120.976	161.866	124.004	126.184	160.559		252.66	283.868	333.198		276.058	314.122	281.779
Bradi3g38640.1		maker-scaffold_11154|ref0034124-exonerate_est2genome-gene-0.0	255.508	163.357	225.333	222.475	355.765		470.838	162.491	266.899	226.575	337.874		214.139	250.813	241.59		265.649	228.373	261.667
Bradi1g77020.1	BdSOC1	maker-scaffold_156|ref0007460-exonerate_est2genome-gene-0.0	3.1203	4.66904	4.72785	5.95447	3.09706		0.241952	0.0781208	0	0.173687	0.172737		2.92488	3.59093	1.92183		0	0.146205	0.104751
Bradi3g32090.1	BdSOC1-like	maker-scaffold_10825|ref0033276-exonerate_est2genome-gene-0.0	41.812	23.9362	46.6031	55.9837	41.5324		9.67806	6.87463	7.79899	9.98701	5.61397		39.0814	19.4279	28.7474		25.4527	15.3516	13.8271
Bradi3g00730.1	BdMAD32	maker-scaffold_6002|ref0025562-exonerate_est2genome-gene-0.0	12.8378	14.7754	14.7745	17.9218	19.9324		21.0498	23.6706	40.3814	31.0032	22.4559		30.0578	19.3358	22.5815		16.2555	9.21095	16.1316
Bradi3g41300.1		maker-scaffold_2419|ref0041984-snap-gene-0.13	27.9044	11.8204	10.6377	11.7922	7.86178		7.0166	4.99973	4.24612	7.90277	6.30491		2.55149	2.2098	1.84176		2.42406	3.21652	2.61877
Bradi2g59190.1	BdMADS51-like	maker-scaffold_14019|ref0031148-snap-gene-0.7	1.69388	4.60994	4.98113	4.6118	3.65295		2.66147	2.65611	6.84578	3.64743	1.20916		4.41844	4.60376	4.64443		2.49536	1.97377	2.19976
Bradi2g59120.1	BdMADS51-like	snap_masked-scaffold_3738|ref0013345-processed-gene-0.15	2.31794	3.01419	4.39015	5.07882	2.85883		11.4927	11.4838	21.3172	17.3687	12.3507		2.67595	2.94641	2.48237		6.13145	5.04409	5.44704
Bradi5g14550.1		maker-scaffold_16193|ref0011945-exonerate_est2genome-gene-0.0	21.6638	18.4989	14.9434	16.6375	37.3236		33.6313	33.5138	44.5409	31.5242	28.7608		44.62	57.7311	49.6473		50.2637	44.4465	48.2901
Bradi2g48060.1	BdLFL1	maker-scaffold_5743|ref0006119-exonerate_est2genome-gene-0.0	0.0891515	0.236407	0.168852	0.116754	0.317648		0	0.0781208	0.173311	0.173687	0		2.86265	3.86716	3.12298		0.142592	0	0.314252
Bradi5g20340.1	BdLFY	scaffold_1714_between_11497-8208	0.0891515	0.0591018	0.253278	0.116754	0.317648		0	0.0781208	0.0866555	0.0868436	0.0863687		0.497852	0.18415	0.560534		0.285184	0.292411	0.104751
Bradi1g21980.1		maker-scaffold_3028|ref0043259-snap-gene-0.13	12.7487	28.6644	23.8081	10.1576	13.8971		0.846831	0.859329	1.5598	1.82372	1.3819		11.5751	6.16904	23.3022		8.98329	4.09375	3.56152
Bradi1g59250.1	BdFUL2	maker-scaffold_4956|ref0006552-exonerate_est2genome-gene-0.0	4.27927	3.487	3.12376	1.34268	1.82647		0	0	0	0.0868436	0.69095		0.746778	0.368301	3.52336		0.427776	0.292411	0.209501
Bradi1g08340.1	VRN1_FUL1	maker-scaffold_312|ref0002704-exonerate_est2genome-gene-0.1	5.08163	36.8795	48.9671	68.1846	59.3207		0.362927	2.18738	4.93936	54.7983	13.7326		33.8539	24.2158	50.2079		34.935	20.1764	25.2449
Bradi4g06870.1		maker-scaffold_5456|ref0004851-exonerate_est2genome-gene-0.1	0	0.118204	0.084426	0.0583772	0		0	0.312483	0.173311	0	0.0863687		0.497852	1.19698	8.96855		0.213888	0.584822	1.04751
Bradi3g33340.1	BdCO9	maker-scaffold_10876|ref0038749-snap-gene-0.10	182.85	16.9622	48.7982	28.3129	4.84413		102.587	9.60886	27.0365	19.0187	6.56402		2.61372	2.30188	1.44137		0.71296	1.16964	2.61877
Bradi3g10010.1	BdVRN2	maker-scaffold_1700|ref0031287-exonerate_est2genome-gene-0.0	0.445757	0	0	0	0.158824		0.483903	0.0781208	0.173311	0.0868436	1.12279		0	0	0		0	0	0
Bradi2g21820.1	BdFDL2	maker-scaffold_8636|ref0033684-exonerate_est2genome-gene-0.0	7.57788	12.766	13.9303	15.3532	11.3559		10.5249	9.60886	16.1179	13.1134	6.82313		18.0471	17.2181	16.5758		13.0472	10.0151	11.4178
Bradi2g53060.1	BdbZIP41	maker-scaffold_423|ref0033813-exonerate_est2genome-gene-0.0	2.31794	2.06856	1.18196	2.74373	3.41471		3.62927	4.06228	7.10575	5.99221	3.97296		6.34761	6.53734	5.04481		5.20461	4.60547	4.19003
Bradi1g63840.1	BdbZIP20	maker-scaffold_440|ref0044604-exonerate_est2genome-gene-0.0	2.58539	1.83215	3.20819	2.80211	3.3353		3.5083	2.96859	1.99308	2.69215	7.94592		4.23174	6.44526	4.96473		3.5648	4.53237	4.81853
Bradi4g43850.1	BdFDL36	maker-scaffold_12990|ref0036404-exonerate_est2genome-gene-0.0	23.8034	22.3405	24.6524	26.0362	29.4618		22.2595	21.7957	26.6899	26.0531	19.5193		18.2338	14.8241	18.0973		13.3323	14.1088	13.1986
Bradi2g24120.1		maker-scaffold_7965|ref0007974-exonerate_est2genome-gene-0.1	23.8034	28.6644	27.1852	24.5768	24.7765		19.961	20.2333	24.2635	18.9319	16.8419		35.3475	43.4595	35.9543		25.8091	30.2645	30.0635
Bradi2g56080.1		maker-scaffold_4901|ref0021606-exonerate_est2genome-gene-0.0	1.96133	3.3097	1.43524	1.75132	2.38236		1.81464	4.45289	7.62568	4.34218	1.90011		10.2682	10.8649	7.52717		9.33977	5.19029	6.28504
Bradi2g55550.1	BdbZIP42	maker-scaffold_3460|ref0022619-exonerate_est2genome-gene-0.4	0.178303	0.118204	0.168852	0.175132	0.0794119		0.362927	0.624966	0.866555	0.0868436	0.172737		0.124463	0.276225	0.160153		0	0.146205	0
Bradi4g32090.1	BdbZIP71	maker-scaffold_3347|ref0045262-exonerate_est2genome-gene-0.1	19.9699	16.3121	19.1647	23.3509	21.2824		10.041	22.7332	26.0833	25.7925	21.6785		18.1716	18.1388	16.3356		11.1222	11.1847	11.9416
Bradi1g46060.1	BdbZIP16	maker-scaffold_11848|ref0010003-exonerate_est2genome-gene-0.0	10.9656	12.0568	8.86473	8.23118	9.13237		7.25855	18.5927	17.0711	11.4634	9.84603		24.8304	18.6913	19.6187		21.2462	11.3309	12.5701
Bradi3g57960.1	BdbZIP62	maker-scaffold_14262|ref0006657-exonerate_est2genome-gene-0.0	41.4554	36.584	16.5475	15.5283	17.0736		24.1952	72.0274	94.4544	44.8113	32.8201		31.8003	24.8603	20.6597		46.0572	17.8371	23.3594
Bradi3g00300.1	BdbZIP45	maker-scaffold_19233|ref0021310-exonerate_est2genome-gene-0.0	1.24812	0.531916	0.253278	0.0583772	0.317648		0	0.0781208	0	0	0		0.435621	1.1049	2.64252		0.071296	0.219308	0.628504
Bradi3g60870.1	BdbZIP63	maker-scaffold_2219|ref0008013-exonerate_est2genome-gene-0.0	2.67454	1.30024	1.35082	1.45943	0.714707		0.120976	0.781208	1.03987	0.260531	0.777318		4.23174	7.36601	6.32603		2.92313	4.82478	5.55179
Bradi1g29920.1	BdbZIP8	maker-scaffold_5161|ref0039043-exonerate_est2genome-gene-0.0	0	0.295509	0.168852	0.175132	0.317648		0.120976	0.312483	0.259966	0.173687	0.431843		0.186695	0.18415	0.240229		0.35648	0.657925	0.942756
Bradi5g21700.1	BdMAD55	maker-scaffold_172|ref0043343-exonerate_est2genome-gene-1.2	0	0	0	0	0.0794119		0	0	0	0	0		0.124463	0	0		0.071296	0.0731027	0
Bradi1g45810.1	BdVRT2	maker-scaffold_4448|ref0017406-exonerate_est2genome-gene-0.0	111.529	102.66	115.326	126.445	72.8207		96.5387	147.414	200.521	187.929	63.3083		126.454	90.9703	123.077		125.695	88.3812	96.9992
Bradi1g72150.1	BdMAD18	maker-scaffold_78|ref0006767-snap-gene-1.30	9.45006	4.19622	9.79341	8.87333	6.43236		27.7035	20.5458	21.8372	25.0978	18.9147		16.927	25.2286	21.1402		44.7739	32.1652	28.0732
Bradi3g58220.1	BdMAD44	maker-scaffold_17914|ref0043065-exonerate_est2genome-gene-0.0	61.6928	78.0143	94.8948	89.4339	58.8442		154.365	199.833	348.355	197.917	83.9504		86.5018	80.5658	104.179		94.3959	75.9537	83.4863
Bradi1g01520.1	BdFRI	maker-scaffold_1544|ref0030922-exonerate_est2genome-gene-0.5	1.69388	0.768323	1.85737	1.16754	1.58824		6.89562	3.67168	6.06588	8.7712	4.49117		1.99141	0.828676	2.40229		6.20275	4.02065	4.29478
Bradi1g15320.1		maker-scaffold_1064|ref0014577-exonerate_est2genome-gene-0.5	14.7991	14.0071	13.9303	14.4192	15.0883		18.2673	25.4674	28.423	25.7057	13.0417		29.3733	29.6482	22.5815		26.2369	17.6178	19.7979
Bradi4g38000.1	BdSUF4	maker-scaffold_13041|ref0047118-exonerate_est2genome-gene-0.2	23.8034	32.506	32.8417	40.1051	37.4824		45.124	43.1227	51.1267	52.2798	40.3342		60.9869	52.8511	51.3289		81.1348	71.6407	63.5837
Bradi4g08730.1	BdFCA	maker-scaffold_12071|ref0011173-exonerate_est2genome-gene-0.0	16.6713	15.2483	13.8459	18.8558	26.7618		18.9932	11.0932	17.851	15.4582	11.0552		15.4956	14.732	15.1344		9.76755	11.3309	9.74182
Bradi2g60820.1	BdFY	maker-scaffold_8995|ref0019393-exonerate_est2genome-gene-0.0	18.2761	22.4587	17.7295	21.6579	18.2647		42.7045	27.9672	33.8823	28.9189	21.4194		43.3754	39.3161	39.878		43.4905	41.0106	40.2243
Bradi5g18210.1	BdFLD	maker-scaffold_12064|ref0029074-exonerate_est2genome-gene-0.1	3.74436	3.60521	3.03933	5.19557	7.94119		4.59708	6.87463	6.49916	8.33698	6.47765		8.40125	9.94412	9.92946		9.05459	10.673	12.8843
Bradi4g35250.1	BdFPA	maker-scaffold_6622|ref0027132-exonerate_est2genome-gene-0.0	21.1289	29.019	26.9319	29.8891	28.0324		51.7776	31.4046	45.9274	40.9033	36.2749		36.3432	35.2648	43.0811		36.86	50.1485	40.0148
Bradi2g47940.1	BdFVE	maker-scaffold_341|ref0045819-exonerate_est2genome-gene-0.3	43.3276	75.1774	61.9687	59.6615	56.3825		69.803	68.9025	95.7543	73.5565	53.2895		254.278	273.739	306.852		227.505	237.876	250.249
Bradi2g59940.1	BdLD	maker-scaffold_5227|ref0045645-exonerate_est2genome-gene-0.1	8.46939	13.5343	9.62456	10.9749	13.4206		19.4771	17.8897	21.3172	13.6344	12.6962		21.781	17.0339	24.0229		22.1017	16.8136	18.8551
Bradi4g02690.1	BdFLKa	maker-scaffold_774|ref0042888-exonerate_est2genome-gene-0.0	23.4468	42.5533	32.3351	36.4857	24.5383		52.6245	52.4191	66.0315	49.0666	23.4923		88.6799	70.7137	69.6664		67.5886	54.4615	56.9844
Bradi1g14320.1	BdFLKb	maker-scaffold_7065|ref0030538-exonerate_est2genome-gene-0.1	18.811	40.6029	28.3671	23.6428	21.3618		27.8244	43.9039	34.4889	26.8347	18.8284		37.3389	23.3871	25.3041		34.8637	26.7556	31.4252
Bradi3g24710.1	BdLHP1	maker-scaffold_2824|ref0016896-exonerate_est2genome-gene-0.1	52.7777	47.9315	49.2203	48.0444	49.9501		56.7377	48.7474	56.586	48.6324	35.9294		66.0276	63.1636	55.0925		49.2655	52.4878	55.0989
Bradi3g12900.1		maker-scaffold_5713|ref0000647-exonerate_est2genome-gene-0.1	49.7465	64.3618	57.1564	59.6615	54.6354		91.2158	71.9493	109.619	85.3672	47.1573		63.9118	43.7357	49.0868		56.3238	42.3265	34.9867
Bradi3g33600.1	BdPEP	maker-scaffold_12617|ref0042172-exonerate_est2genome-gene-0.1	35.5714	62.2342	55.89	58.1437	47.4089		62.9074	63.5903	70.6242	68.6064	40.4205		87.3108	66.0179	75.5921		74.5756	68.9359	75.7348
Bradi1g48340.1	BdCLF	maker-scaffold_6459|ref0015540-exonerate_est2genome-gene-0.0	2.85285	4.01892	1.68852	2.45184	1.66765		1.57269	2.18738	4.24612	2.95268	1.72737		61.1736	69.5167	79.1154		46.2711	54.9002	64.7359
Bradi3g14520.1	BdFIE1	maker-scaffold_4385|ref0037320-exonerate_est2genome-gene-0.2	3.65521	6.6785	5.48769	4.6118	6.90884		10.2829	7.4996	5.89257	5.81852	9.67329		15.1845	16.2973	16.8961		16.0416	22.4425	21.1596
Bradi1g13930.1	BdMSI1	maker-scaffold_6614|ref0009121-exonerate_est2genome-gene-0.1	16.9388	24.8818	13.8459	19.2645	20.8853		21.0498	22.3425	21.0573	23.0135	16.5828		70.0727	70.8979	76.553		58.1062	62.5028	62.7457
Bradi1g64460.1	BdSWN	maker-scaffold_14117|ref0033419-exonerate_est2genome-gene-0.1	69.0032	58.2152	58.3383	55.9253	96.6443		185.456	87.2609	178.51	117.673	77.4727		69.6993	69.1484	83.1993		66.1627	52.0492	58.0319
Bradi4g05950.1	BdVIL5	maker-scaffold_12626|ref0047658-exonerate_est2genome-gene-0.1	30.3115	39.8346	35.7966	42.4402	46.456		59.1572	43.982	53.2064	47.4166	40.4205		34.0406	20.7169	21.2202		22.8147	15.8633	18.4361
Bradi2g36240.1		maker-scaffold_3350|ref0014712-snap-gene-0.26	24.5167	58.1561	28.1138	31.5237	38.4354		31.5747	28.5141	16.2046	16.9345	20.9876		24.0836	22.9267	28.1869		23.0286	23.8315	25.4544
Bradi3g17950.1	BdVIL4	maker-scaffold_5307|ref0047900-exonerate_est2genome-gene-0.1	1.60473	0.591018	0.590982	0.758903	0.39706		0.120976	0.624966	0.866555	1.21581	0.172737		32.6093	35.8172	35.8742		26.9499	25.9515	27.5494
Bradi1g33450.1	BdVIL1	maker-scaffold_6167|ref0023087-exonerate_est2genome-gene-0.6	1.78303	2.12766	1.09754	2.91886	2.7		5.32294	4.29664	1.73311	2.17109	2.67743		0.995704	1.19698	0.960916		0.641664	0.511719	0.838006
Bradi3g04140.1	BdVIL3	maker-scaffold_8882|ref0022306-exonerate_est2genome-gene-0.0	35.304	69.3855	36.3876	42.8489	53.8413		47.4225	55.5439	55.0262	59.8352	29.6245		96.8322	95.4819	95.2908		95.9644	82.3868	83.6958
Bradi3g03110.1		maker-scaffold_12290|ref0048236-exonerate_est2genome-gene-0.0	79.9689	78.8417	74.8014	93.6954	99.4237		173.963	136.711	140.382	161.182	106.061		76.9804	76.2382	84.7208		105.233	119.888	108.626
Bradi3g03040.1	BdPAF	maker-scaffold_7627|ref0000601-exonerate_est2genome-gene-0.0	24.695	56.7968	58.5916	56.801	38.0383		32.3005	43.9039	40.2081	40.9902	34.4611		82.6434	82.7756	82.0782		89.8329	96.4225	84.0101
Bradi1g57640.1	BdPIE1	maker-scaffold_4461|ref0004924-exonerate_est2genome-gene-0.2	60.2664	62.3524	58.4228	60.0701	61.4648		80.086	55.3095	96.8808	80.4171	56.3988		105.669	82.8676	103.138		101.383	81.5096	81.2865
Bradi3g45730.1		maker-scaffold_12764|ref0015886-exonerate_est2genome-gene-0.0	33.8776	32.6242	22.8794	23.5844	38.9118		47.6645	36.0137	36.9152	33.6085	42.6661		73.2465	73.1998	76.1526		59.746	58.7015	57.1939
Bradi2g10130.1	BdARP6	maker-scaffold_6487|ref0019290-exonerate_est2genome-gene-0.0	5.7057	7.03311	7.85161	10.216	8.0206		4.4761	3.98416	7.53902	7.55539	2.93654		11.6373	13.2588	12.7321		9.62496	9.21095	9.00856
Bradi2g10130.1	BdARP6	maker-scaffold_2071|ref0020178-exonerate_est2genome-gene-0.1	0.62406	1.83215	1.26639	2.39346	1.90589		0.725855	1.09369	2.42635	1.73687	0.950056		1.92918	1.4732	1.12107		1.99629	1.82757	1.57126
