# Supplementary material for: Identification and Characterization of Perennial Ryegrass (Lolium perenne) Vernalization Genes
Source: Front Plant Sci. 2021 Mar 5;12:640324. doi: 10.3389/fpls.2021.640324 (PMC7973463; doi:10.3389/fpls.2021.640324)
Supplement: Supplementary file 5 [file Data_Sheet_4.XLSX]

## Sheet: Sheet1
Supplementary Dataset S4 - RNAseq gene expression of FT-like genes in reads per million mapped reads (RPM)
Gene name	Annotation	Homology	Falster_leaf_0hVern	Falster_leaf_2d_Vern	Falster_leaf_4w_Vern	Falster_leaf_9w_Vern	Falster_leaf_7d_LD	Falster_leaf_pattern	Veyo_leaf_0hVern	Veyo_leaf_2dVern	Veyo_leaf_4wVern	Veyo_leaf_9wVern	Veyo_leaf_7dLD	Veyo_leaf_pattern	Falster_merist_9w_vern	Falster_merist_1d_LD	Falster_merist_7d_LD	Falster_merist_pattern	Veyo_merist_9w_vern	Veyo_merist_1d_LD	Veyo_merist_7d_LD	Veyo_merist_pattern
Lp_FT01	maker-scaffold_9269|ref0005840-exonerate_est2genome-gene-0.0	BdFTL12	9.19416	12.4212	0.866555	0.781592	5.7867		2.85285	9.04257	4.98113	2.5686	14.6912		0.142592	0.292411	0.104751		0	0	0
Lp_FT02	maker-scaffold_13332|ref0029013-exonerate_est2genome-gene-0.0	BdFTL1	1.93561	2.42174	6.58581	7.29486	1.20916		7.84533	10.1064	12.7483	9.92412	11.2765		2.21017	0.950336	0.838006		6.65877	1.65735	3.68351
Lp_FT03	maker-scaffold_5073|ref0007295-snap-gene-0.11	BdFTL2	0.120976	0.234362	0.0866555	0.260531	0.518212		0.0891515	0.413712	0.253278	0.116754	16.5177		0	0	0		0.0622315	0	0.560534
Lp_FT04	maker-scaffold_2755|ref0033256-exonerate_est2genome-gene-0.0	BdfRCN2	0	0	0	0.0868436	0		0	0	0	0	0		5.13331	1.46205	0.628504		4.04505	0.644526	5.92565
Lp_FT05	maker-scaffold_3301|ref0020207-exonerate_est2genome-gene-0.1	MFT1	0	0	0.0866555	0	0		0.0891515	0.118204	0	0.0583772	0.238236		0	0.0731027	0		0	0	0.240229
Lp_FT06	maker-scaffold_821|ref0016245-exonerate_est2genome-gene-0.0	BdRCN4	0	0	0.0866555	0.173687	0		0	0	0.084426	0.0583772	0		0.926848	0.657925	0.209501		1.1824	1.74943	4.32412
Lp_FT07	maker-scaffold_16577|ref0028870-snap-gene-0.3	TFL	5.92781	2.2655	3.81284	7.12117	2.7638		6.77551	7.21041	11.0598	9.51548	9.37061		7.55737	8.1144	7.75155		9.52142	12.246	14.9743
Lp_FT08	maker-scaffold_5827|ref0034787-exonerate_est2genome-gene-0.3	BdFTL9/BdFTL10	9.43611	13.8274	61.3521	29.1794	7.08223		1.42642	13.7707	10.7221	13.6603	1.90589		0.926848	0.438616	0.838006		0.622315	0.0920752	0
Lp_FT09	maker-scaffold_2033|ref0043420-snap-gene-0.18	BdFTL13	0	0	0	0.0868436	0		0	0	0	0	0		0	0	0		0.0622315	0	0
Lp_FT10	maker-scaffold_2347|ref0000210-exonerate_est2genome-gene-0.4	BdFTL4	0.604879	0.859329	0.779899	2.95268	1.12279		1.06982	0.177305	0.42213	0.525395	0.873531		0.570368	1.16964	1.46651		2.30257	1.93358	2.00191
Lp_FT11	maker-scaffold_1783|ref0029509-snap-gene-0.24	OsFTL11	0	0	0	0	0.172737		0	0	0	0	0		0.071296	0.0731027	0		0	0	0
Lp_FT12	maker-scaffold_2852|ref0041759-snap-gene-0.18	OsFTL6	1.33073	1.09369	1.47314	2.34478	1.12279		0.891515	0.531916	0.928686	0.934035	1.27059		2.21017	2.04688	1.57126		1.30686	2.5781	1.84176
Lp_FT13	maker-scaffold_751|ref0030400-snap-gene-0.22	BdFTL6	0	0	0.259966	0	0		0	0	0	0	0		0	0.146205	0		0.0622315	0	0
Lp_FT14	snap_masked-scaffold_16549|ref0023552-processed-gene-0.1	FTL7	0	0	0	0	0		0.267454	0.236407	0	0.0583772	0.0794119		0	0	0		0	0	0
Lp_FT15	maker-scaffold_172|ref0043343-snap-gene-0.17	FTL7	0	0	0	0	0		0.0891515	0	0	0	0		0	0	0		0	0	0
Lp_FT16	maker-scaffold_1244|ref0044124-snap-gene-0.24	FTL7	0	0	0	0.0868436	0		0	0	0	0	0.0794119		0	0	0		0.0622315	0	0
Lp_FT17	maker-scaffold_1244|ref0044124-exonerate_est2genome-gene-0.0	FTL7	0.120976	0.0781208	0	0	0.172737		0.534909	0.531916	0	0	0		0.142592	0	0		0	0	0
Lp_FT18	maker-scaffold_25829|ref0017003-snap-gene-0.1	MFT2	0	0	0.0866555	0	0		0	0	0	0	0		0	0	0		0	0.0920752	0
