# Supplementary material for: Identification and Characterization of Perennial Ryegrass (Lolium perenne) Vernalization Genes
Source: Front Plant Sci. 2021 Mar 5;12:640324. doi: 10.3389/fpls.2021.640324 (PMC7973463; doi:10.3389/fpls.2021.640324)
Supplement: Supplementary file 6 [file Data_Sheet_5.XLSX]

## Sheet: Sheet1
Supplementary Dataset S5 - CCT-domain genes in Lolium perenne and their expression during vernalization in reads per million (RPM)
	Veyo_0h_vern	Veyo_2d_vern	Veyo_4w_vern	Veyo_9w_vern	Veyo_7d_LD	Veyo_pattern	Falster_0h_vern	Falster_2d_vern	Falster_4w_vern	Falster_9w_vern	Falster_7d_LD	Falster_pattern	Gene name/homology
maker-scaffold_5059|ref0019898-exonerate_est2genome-gene-0.1	0.891515	8.09694	3.54589	7.64741	6.27354		0.0604879	0.421852	0.129983	0.0868436	0.492302		LpCO
maker-scaffold_393|ref0000952-exonerate_est2genome-gene-0.4	221.72	208.629	210.558	231.057	215.842		26.6389	25.069	21.2393	16.9519	25.4269		Similar to BdCO4
maker-scaffold_24449|ref0048029-exonerate_est2genome-gene-0.0	7.75618	2.54138	4.559	1.69294	5.40001		0.520196	0.367168	0.433277	0.208425	0.630491		Similar to BdCO5
maker-scaffold_1502|ref0005850-exonerate_est2genome-gene-0.1	77.6509	82.0332	97.0899	89.7841	38.5148		12.5573	8.03082	8.2756	5.14982	7.24633		Similar to BdCO6
maker-scaffold_10630|ref0040578-exonerate_est2genome-gene-0.0	93.8765	39.8346	100.636	89.4922	39.6265		12.5331	4.49195	12.4177	8.41514	6.54675		Similar to BdCO7
maker-scaffold_1084|ref0000358-snap-gene-0.31	8.73685	8.68796	8.4426	11.7922	11.753		0.520196	0.132805	0.407281	0.521061	0.535486		Similar to CO2
maker-scaffold_10876|ref0038749-snap-gene-0.10	182.85	16.9622	48.7982	28.3129	4.84413		10.2587	0.960886	2.70365	1.90187	0.656402		LpCO9
maker-scaffold_12164|ref0018948-exonerate_est2genome-gene-0.1	195.153	162.293	144.622	204.028	188.365		10.791	6.92931	5.83191	7.91145	11.3575		Similar to OsCO3
maker-scaffold_936|ref0025737-exonerate_est2genome-gene-0.3	0.62406	0.650119	0.506556	0.233509	0.238236		0.145171	0.203114	0.502602	0.234478	0.146827		LpVRN2a
maker-scaffold_1700|ref0031287-exonerate_est2genome-gene-0.0	0.445757	0	0	0	0.158824		0.0483903	0.00781208	0.0173311	0.00868436	0.112279		LpVRN2b
maker-scaffold_14761|ref0042273-exonerate_est2genome-gene-0.0	0	0	0.084426	0	0		0	0	0	0	0
maker-scaffold_3186|ref0043886-exonerate_est2genome-gene-0.0	28.6176	56.5604	55.5523	59.8366	50.3471		3.62927	7.6949	10.9273	5.78378	3.4202
maker-scaffold_5879|ref0040206-exonerate_est2genome-gene-0.2	201.572	231.62	210.474	245.243	302.718		22.2595	21.827	22.8597	18.2545	28.0957		Similar to BdPRR73
maker-scaffold_4587|ref0024320-exonerate_est2genome-gene-0.3	21.4855	117.317	146.057	201.46	208.536		4.79064	13.5461	23.4056	23.882	8.80097		Similar to BdPRR59
maker-scaffold_1329|ref0023235-exonerate_est2genome-gene-0.0	42.347	23.5225	44.0704	40.1051	13.8971		3.9922	2.89047	7.62568	7.47723	1.59782
maker-scaffold_7782|ref0026533-exonerate_est2genome-gene-0.0	22.9119	30.1419	35.3745	50.9049	65.1178		3.0002	1.73428	2.74698	4.39428	5.12166
maker-scaffold_710|ref0006961-exonerate_est2genome-gene-0.4	3.03115	1.71395	1.60409	2.45184	2.54118		0.145171	0.0624966	0.0519933	0.0607905	0.0604581
maker-scaffold_11576|ref0022286-exonerate_est2genome-gene-0.0	159.492	40.1301	161.422	148.278	34.4648		13.2469	6.57777	13.0936	28.1286	8.20503
maker-scaffold_799|ref0008792-exonerate_est2genome-gene-0.2	184.454	103.428	175.268	163.748	172.562		21.4248	25.1315	25.2167	22.9267	33.7615
maker-scaffold_13366|ref0021945-exonerate_est2genome-gene-0.0	23.6251	2.18677	34.5302	48.6866	60.8295		0.822635	0.554658	2.20105	1.97135	4.27525		LpPRR37
maker-scaffold_2926|ref0025544-exonerate_est2genome-gene-0.0	189.358	232.034	672.368	487.333	142.465		11.65	36.748	94.2985	74.5552	10.0274		Similar to BdPRR95
maker-scaffold_4659|ref0037345-exonerate_est2genome-gene-0.0	0	0	0	0	0		0.0241952	0	0.095321	0.00868436	0
maker-scaffold_6244|ref0025893-exonerate_est2genome-gene-0.2	18.0978	80.9103	104.688	135.785	100.535		2.68566	9.7651	13.7349	15.3453	2.72061		LpTOC1
maker-scaffold_6636|ref0045013-exonerate_est2genome-gene-0.0	0	0.0591018	0.084426	0.0583772	0.158824		0	0	0	0	0
maker-scaffold_10565|ref0019752-exonerate_est2genome-gene-0.0	0.178303	0.0591018	0.168852	0	0		0.0120976	0.00781208	0.0519933	0	0.0259106
maker-scaffold_2645|ref0017739-exonerate_est2genome-gene-0.0	13.0161	68.7353	104.182	160.012	124.597		1.77834	9.09326	16.3519	20.4603	5.88171
maker-scaffold_7721|ref0001648-exonerate_est2genome-gene-0.3	25.5865	21.2175	28.0294	28.78	17.9471		2.68566	1.92958	1.88909	1.9974	1.65828
maker-scaffold_1|ref0040986-exonerate_est2genome-gene-4.0	0	0	0	0.0583772	0		0.0120976	0	0.095321	0.0434218	0
maker-scaffold_1093|ref0030913-exonerate_est2genome-gene-0.5	32.0945	25.5911	33.9392	41.331	28.3501		4.5124	3.28107	4.81804	3.95138	2.97972
maker-scaffold_1607|ref0016426-exonerate_est2genome-gene-0.2	25.4973	23.0497	21.4442	24.5184	19.0589		3.0244	2.96859	3.88216	3.12637	1.83102
maker-scaffold_4990|ref0001756-exonerate_est2genome-gene-0.2	17.2062	20.8038	15.1967	15.4116	13.5794		0.967806	0.82808	1.41248	2.00609	0.811866
maker-scaffold_4172|ref0027178-exonerate_est2genome-gene-0.1	8.20194	27.0095	8.35817	4.96206	6.11472		1.45171	5.48408	3.03294	1.65003	0.673676
maker-scaffold_1159|ref0009995-exonerate_est2genome-gene-0.1	0.0891515	0	0.084426	0.0583772	0		0.0120976	0	0	0	0
maker-scaffold_6543|ref0029409-exonerate_est2genome-gene-0.2	25.2299	8.27425	9.54013	6.1296	7.94119		0.471806	0.554658	0.346622	0.373427	0.915508
maker-scaffold_9134|ref0025624-exonerate_est2genome-gene-0.1	0	1.47754	0.168852	0.116754	0.873531		0.0846831	0.0390604	0	0.0434218	0.0172737
maker-scaffold_1808|ref0034974-snap-gene-0.24	14.1751	34.6336	21.9507	58.8442	31.4471		0.992002	7.87458	5.51995	4.2727	1.70146		"Lp_vrn2_2"
